# Supplementary material for: De novo variants in Chinese ASD trios reveal genetic basis underlying autism without developmental delay and intellectual disabilities
Source: bioRxiv preprint, doi:10.1101/2021.09.30.462503, version 1 (2021-09-30)
Supplement: Table S1 [file 462503_file03.xlsx]

## Sheet: 总表
verified by Sanger sequencing?	family	HFA/LFA	IQ/DQ	ExonicFuncxrefGene	CHROM	POS	REF	ALT	GenexrefGene	AAChangexrefGene
verified	1	HFA	96.25	nonsynonymous SNV	chr11	9771440	T	G	SWAP70	SWAP70:NM_001297714:exon11:c.1507T>G:p.W503G,SWAP70:NM_015055:exon12:c.1681T>G:p.W561G
verified	3	HFA	84.8	nonsynonymous SNV	chr7	75174465	A	G	HIP1	HIP1:NM_001243198:exon24:c.2428T>C:p.F810L,HIP1:NM_005338:exon26:c.2581T>C:p.F861L
verified	4	HFA	73.8	nonsynonymous SNV	chr13	50102794	C	T	PHF11	PHF11:NM_001040443:exon10:c.989C>T:p.S330F,PHF11:NM_001040444:exon11:c.872C>T:p.S291F
verified	4	HFA	73.8	nonsynonymous SNV	chr18	3457931	C	T	TGIF1	TGIF1:NM_001278682:exon3:c.821C>T:p.T274I,TGIF1:NM_003244:exon3:c.812C>T:p.T271I,TGIF1:NM_170695:exon3:c.1199C>T:p.T400I,TGIF1:NM_173207:exon3:c.854C>T:p.T285I,TGIF1:NM_173209:exon3:c.752C>T:p.T251I,TGIF1:NM_173210:exon3:c.752C>T:p.T251I,TGIF1:NM_173211:exon3:c.752C>T:p.T251I,TGIF1:NM_001278684:exon4:c.812C>T:p.T271I,TGIF1:NM_001278686:exon4:c.752C>T:p.T251I,TGIF1:NM_173208:exon4:c.812C>T:p.T271I…
verified	4	HFA	73.8	nonsynonymous SNV	chr10	77159595	T	G	ZNF503	ZNF503:NM_032772:exon2:c.853A>C:p.S285R
verified	6	HFA	80.5	frameshift deletion	chr10	95658506	AAAGT	A	SLC35G1	SLC35G1:NM_001134658:exon2:c.358_359del:p.K120fs,SLC35G1:NM_153226:exon2:c.355_356del:p.K119fs
verified	8	HFA	73.25	nonsynonymous SNV	chr19	56090947	C	A	ZNF579	ZNF579:NM_152600:exon2:c.59G>T:p.R20L
verified	9	HFA	70	nonsynonymous SNV	chr1	145539092	A	C	ITGA10	ITGA10:NM_001303041:exon21:c.2603A>C:p.N868T,ITGA10:NM_001303040:exon22:c.2639A>C:p.N880T,ITGA10:NM_003637:exon25:c.3032A>C:p.N1011T
verified	9	HFA	70	nonsynonymous SNV	chr10	95661080	G	C	SLC35G1	SLC35G1:NM_001134658:exon3:c.931G>C:p.A311P,SLC35G1:NM_153226:exon3:c.928G>C:p.A310P
verified	10	HFA	84.6	nonsynonymous SNV	chr14	24877300	C	T	NYNRIN	NYNRIN:NM_025081:exon3:c.424C>T:p.R142C
verified	10	HFA	84.6	nonsynonymous SNV	chr12	53800492	G	A	SP1	SP1:NM_001251825:exon4:c.1655G>A:p.R552Q,SP1:NM_003109:exon4:c.1778G>A:p.R593Q,SP1:NM_138473:exon4:c.1799G>A:p.R600Q
verified	12	HFA	84.2	nonsynonymous SNV	chr22	24572112	C	G	CABIN1	CABIN1:NM_001201429:exon34:c.5924C>G:p.T1975S,CABIN1:NM_001199281:exon35:c.6074C>G:p.T2025S,CABIN1:NM_012295:exon35:c.6074C>G:p.T2025S
verified	15	HFA	75.2	nonsynonymous SNV	chr19	4037451	C	T	PIAS4	PIAS4:NM_015897:exon10:c.1222C>T:p.R408C
verified	18	HFA	74.5	nonsynonymous SNV	chr12	113314609	G	C	RPH3A	RPH3A:NM_014954:exon12:c.1097G>C:p.R366P,RPH3A:NM_001143854:exon13:c.1109G>C:p.R370P
verified	19	HFA	88	nonsynonymous SNV	chr16	66424425	G	A	CDH5	CDH5:NM_001795:exon6:c.901G>A:p.D301N
verified	20	HFA	85.5	nonsynonymous SNV	chr5	139917129	G	T	ANKHD1,ANKHD1-EIF4EBP3	ANKHD1:NM_017747:exon31:c.7183G>T:p.V2395F,ANKHD1-EIF4EBP3:NM_020690:exon31:c.7183G>T:p.V2395F
verified	20	HFA	85.5	nonsynonymous SNV	chr14	51196407	G	A	NIN	NIN:NM_016350:exon28:c.3773C>T:p.P1258L,NIN:NM_020921:exon29:c.5912C>T:p.P1971L,NIN:NM_182944:exon29:c.5912C>T:p.P1971L,NIN:NM_182946:exon29:c.5912C>T:p.P1971L
verified	21	HFA	110	nonsynonymous SNV	chr3	9798825	G	A	OGG1	OGG1:NM_016820:exon7:c.1046G>A:p.R349Q
verified	25	HFA	91.75	nonsynonymous SNV	chr13	92797194	G	A	GPC5	GPC5:NM_004466:exon7:c.1513G>A:p.G505R
verified	28	HFA	74.5	nonsynonymous SNV	chr20	62324513	C	T	RTEL1	RTEL1:NM_001283010:exon29:c.2200C>T:p.R734W,RTEL1:NM_001283009:exon30:c.2869C>T:p.R957W,RTEL1:NM_016434:exon30:c.2869C>T:p.R957W,RTEL1:NM_032957:exon30:c.2941C>T:p.R981W
verified	29	HFA	76.4	nonsynonymous SNV	chrX	62570525	C	G	SPIN4	SPIN4:NM_001012968:exon1:c.174G>C:p.Q58H
verified	30	HFA	106	nonsynonymous SNV	chr1	171546747	C	G	PRRC2C	PRRC2C:NM_015172:exon26:c.7124C>G:p.P2375R
verified	32	HFA	75.25	nonsynonymous SNV	chr11	70179613	G	A	PPFIA1	PPFIA1:NM_003626:exon10:c.1250G>A:p.R417Q,PPFIA1:NM_177423:exon10:c.1250G>A:p.R417Q
verified	34	HFA	81.5	stopgain	chr5	127614498	G	A	FBN2	FBN2:NM_001999:exon57:c.7174C>T:p.Q2392X
verified	34	HFA	81.5	frameshift insertion	chr17	27849329	T	TA	TAOK1	TAOK1:NM_020791:exon17:c.1941dupA:p.L647fs
verified	35	HFA	86	stopgain	chr1	100661903	T	A	DBT	DBT:NM_001918:exon11:c.1357A>T:p.R453X
verified	36	HFA	76	nonsynonymous SNV	chr9	117139558	G	T	AKNA	AKNA:NM_030767:exon3:c.529C>A:p.Q177K
verified	37	HFA	89.4	nonsynonymous SNV	chr7	91708756	C	T	AKAP9	AKAP9:NM_005751:exon31:c.7309C>T:p.R2437C,AKAP9:NM_147185:exon31:c.7285C>T:p.R2429C
verified	40	HFA	73.8	frameshift deletion	chr7	70228031	AC	A	AUTS2	AUTS2:NM_001127231:exon7:c.919delC:p.P307fs,AUTS2:NM_015570:exon7:c.919delC:p.P307fs
verified	44	HFA	83.68	nonsynonymous SNV	chr1	115053327	G	A	TRIM33	TRIM33:NM_015906:exon1:c.371C>T:p.T124I,TRIM33:NM_033020:exon1:c.371C>T:p.T124I
verified	46	HFA	75.6	nonsynonymous SNV	chr17	38450658	G	T	CDC6	CDC6:NM_001254:exon7:c.986G>T:p.R329M
verified	48	HFA	81.6	nonsynonymous SNV	chr8	12612794	C	T	LONRF1	LONRF1:NM_152271:exon1:c.136G>A:p.E46K
verified	54	HFA	81.4	nonsynonymous SNV	chr17	73944516	T	G	ACOX1	ACOX1:NM_001185039:exon13:c.1637A>C:p.Q546P,ACOX1:NM_004035:exon13:c.1751A>C:p.Q584P,ACOX1:NM_007292:exon13:c.1751A>C:p.Q584P
verified	54	HFA	81.4	nonsynonymous SNV	chr8	145049425	C	T	PLEC	PLEC:NM_000445:exon2:c.113G>A:p.R38Q
verified	55	HFA	71.4	nonsynonymous SNV	chr2	24342543	C	T	PFN4	PFN4:NM_199346:exon4:c.265G>A:p.G89S
verified	60	HFA	75	nonsynonymous SNV	chr10	45799569	G	A	OR13A1	OR13A1:NM_001004297:exon4:c.302C>T:p.A101V
verified	63	HFA	75.4	nonsynonymous SNV	chr19	14184134	A	G	LOC113230	LOC113230:NM_001291291:exon1:c.13A>G:p.I5V
verified	63	HFA	75.4	nonsynonymous SNV	chr17	16024413	G	A	NCOR1	NCOR1:NM_001190438:exon13:c.1478C>T:p.A493V,NCOR1:NM_001190440:exon15:c.1805C>T:p.A602V,NCOR1:NM_006311:exon16:c.1805C>T:p.A602V
verified	65	HFA	72.8	nonsynonymous SNV	chr5	79028244	A	G	CMYA5	CMYA5:NM_153610:exon2:c.3656A>G:p.H1219R
verified	65	HFA	72.8	nonsynonymous SNV	chr7	24911365	G	A	OSBPL3	OSBPL3:NM_145320:exon3:c.263C>T:p.T88I,OSBPL3:NM_145321:exon3:c.263C>T:p.T88I,OSBPL3:NM_145322:exon3:c.263C>T:p.T88I,OSBPL3:NM_015550:exon4:c.263C>T:p.T88I
verified	65	HFA	72.8	frameshift insertion	chr11	66472936	T	TA	SPTBN2	SPTBN2:NM_006946:exon14:c.1810dupT:p.Y604fs
verified	66	HFA	83.2	nonsynonymous SNV	chr16	89251737	G	A	CDH15	CDH15:NM_004933:exon5:c.659G>A:p.R220H
verified	67	HFA	71	stopgain	chr2	239059534	G	A	KLHL30	KLHL30:NM_198582:exon8:c.1565G>A:p.W522X
verified	68	HFA	93.8	nonsynonymous SNV	chr17	41934520	G	A	CD300LG	CD300LG:NM_001168323:exon5:c.779G>A:p.R260H,CD300LG:NM_001168324:exon5:c.626G>A:p.R209H,CD300LG:NM_001168322:exon6:c.881G>A:p.R294H,CD300LG:NM_145273:exon6:c.881G>A:p.R294H
verified	68	HFA	93.8	nonsynonymous SNV	chr3	138668477	A	C	FOXL2NB	FOXL2NB:NM_001040061:exon2:c.216A>C:p.K72N
verified	70	HFA	77	nonsynonymous SNV	chr16	67166803	C	A	C16orf70	C16orf70:NM_025187:exon6:c.439C>A:p.P147T
verified	70	HFA	77	nonsynonymous SNV	chr16	88503695	C	T	ZNF469	ZNF469:NM_001127464:exon2:c.9733C>T:p.P3245S
verified	74	HFA	81.2	nonsynonymous SNV	chr3	125865750	A	G	ALDH1L1	ALDH1L1:NM_001270365:exon7:c.701T>C:p.L234P,ALDH1L1:NM_001270364:exon9:c.1034T>C:p.L345P,ALDH1L1:NM_012190:exon9:c.1004T>C:p.L335P
verified	74	HFA	81.2	nonsynonymous SNV	chr10	103552687	A	C	MGEA5	MGEA5:NM_001142434:exon11:c.1925T>G:p.I642S,MGEA5:NM_012215:exon12:c.2084T>G:p.I695S
verified	75	HFA	70.6	nonsynonymous SNV	chr9	35381120	G	A	UNC13B	UNC13B:NM_006377:exon18:c.2152G>A:p.V718I
verified	76	HFA	71.2	nonsynonymous SNV	chr14	95030078	G	A	SERPINA4	SERPINA4:NM_001289032:exon2:c.370G>A:p.A124T,SERPINA4:NM_001289033:exon2:c.259G>A:p.A87T,SERPINA4:NM_006215:exon2:c.259G>A:p.A87T
verified	80	HFA	71.4	nonsynonymous SNV	chr2	164466688	C	T	FIGN	FIGN:NM_018086:exon3:c.1654G>A:p.G552S
verified	83	HFA	74	frameshift deletion	chr8	41791423	GCTCA	G	KAT6A	KAT6A:NM_006766:exon17:c.4311_4314del:p.S1437fs
verified	83	HFA	74	nonsynonymous SNV	chr6	107954807	A	C	SOBP	SOBP:NM_018013:exon6:c.759A>C:p.K253N
verified	86	HFA	75.4	nonsynonymous SNV	chr10	7213997	T	A	SFMBT2	SFMBT2:NM_001018039:exon19:c.2275A>T:p.R759W,SFMBT2:NM_001029880:exon19:c.2275A>T:p.R759W
verified	87	HFA	79.4	nonsynonymous SNV	chr1	11586811	C	T	PTCHD2	PTCHD2:NM_020780:exon13:c.2717C>T:p.T906M
verified	88	HFA	81	nonsynonymous SNV	chr2	24286000	C	T	FKBP1B	FKBP1B:NM_004116:exon4:c.265C>T:p.P89S
verified	88	HFA	81	nonsynonymous SNV	chr10	6266162	C	T	PFKFB3	PFKFB3:NM_001145443:exon13:c.1267C>T:p.R423W,PFKFB3:NM_001282630:exon13:c.1369C>T:p.R457W,PFKFB3:NM_001314063:exon13:c.1327C>T:p.R443W,PFKFB3:NM_004566:exon13:c.1327C>T:p.R443W
verified	90	HFA	84.25	nonsynonymous SNV	chr2	99013585	A	G	CNGA3	CNGA3:NM_001079878:exon7:c.1898A>G:p.Y633C,CNGA3:NM_001298:exon8:c.1952A>G:p.Y651C
verified	91	HFA	85	nonsynonymous SNV	chr17	49713220	A	G	CA10	CA10:NM_020178:exon7:c.785T>C:p.M262T,CA10:NM_001082533:exon8:c.785T>C:p.M262T,CA10:NM_001082534:exon8:c.785T>C:p.M262T
verified	92	HFA	71.4	nonsynonymous SNV	chr6	132873941	C	T	TAAR8	TAAR8:NM_053278:exon1:c.110C>T:p.A37V
verified	94	HFA	103	nonsynonymous SNV	chr5	122911613	C	T	CSNK1G3	CSNK1G3:NM_001270574:exon3:c.290C>T:p.T97I,CSNK1G3:NM_001044723:exon5:c.629C>T:p.T210I,CSNK1G3:NM_001270572:exon5:c.629C>T:p.T210I,CSNK1G3:NM_001270573:exon5:c.404C>T:p.T135I,CSNK1G3:NM_004384:exon5:c.629C>T:p.T210I,CSNK1G3:NM_001031812:exon6:c.629C>T:p.T210I
verified	95	HFA	77	nonsynonymous SNV	chr1	984698	C	T	AGRN	AGRN:NM_198576:exon25:c.4381C>T:p.R1461W
verified	96	HFA	79.5	nonsynonymous SNV	chr4	4864740	C	A	MSX1	MSX1:NM_002448:exon2:c.782C>A:p.A261E
verified	97	HFA	71.75	nonsynonymous SNV	chr14	61917595	C	A	PRKCH	PRKCH:NM_006255:exon6:c.738C>A:p.H246Q
verified	97	HFA	71.75	nonsynonymous SNV	chr2	32289181	G	T	SPAST	SPAST:NM_014946:exon1:c.281G>T:p.G94V,SPAST:NM_199436:exon1:c.281G>T:p.G94V
verified	98	HFA	89	nonsynonymous SNV	chr16	5083577	G	T	NAGPA	NAGPA:NM_016256:exon2:c.239C>A:p.T80N
verified	98	HFA	89	frameshift insertion	chr9	37354809	C	CA	ZCCHC7	ZCCHC7:NM_001289119:exon8:c.1187dupA:p.Q396fs,ZCCHC7:NM_001289120:exon8:c.1187dupA:p.Q396fs,ZCCHC7:NM_001289121:exon8:c.1187dupA:p.Q396fs,ZCCHC7:NM_032226:exon8:c.1187dupA:p.Q396fs
verified	99	HFA	92.5	nonsynonymous SNV	chr8	17919903	A	T	ASAH1	ASAH1:NM_001127505:exon8:c.515T>A:p.I172K,ASAH1:NM_004315:exon8:c.581T>A:p.I194K,ASAH1:NM_177924:exon8:c.533T>A:p.I178K
verified	99	HFA	92.5	nonframeshift deletion	chr9	139734867	CCCCCGCGCAGCAGGGAGAGGACGGCTG	C	RABL6	RABL6:NM_001173988:exon15:c.2087_2113del:p.696_705del,RABL6:NM_024718:exon15:c.2084_2110del:p.695_704del
verified	99	HFA	92.5	nonsynonymous SNV	chr6	169625369	C	T	THBS2	THBS2:NM_003247:exon18:c.2644G>A:p.A882T
verified	101	HFA	98	nonsynonymous SNV	chr2	166747405	C	T	TTC21B	TTC21B:NM_024753:exon23:c.3044G>A:p.R1015H
verified	102	HFA	81	nonsynonymous SNV	chr1	220825333	C	T	MARK1	MARK1:NM_001286128:exon14:c.1511C>T:p.T504M,MARK1:NM_001286124:exon15:c.1577C>T:p.T526M,MARK1:NM_001286126:exon15:c.1577C>T:p.T526M,MARK1:NM_018650:exon15:c.1577C>T:p.T526M
verified	102	HFA	81	nonsynonymous SNV	chr8	48511646	C	G	SPIDR	SPIDR:NM_001282916:exon9:c.1222C>G:p.P408A,SPIDR:NM_001080394:exon10:c.1432C>G:p.P478A,SPIDR:NM_001282919:exon10:c.1252C>G:p.P418A
verified	104	HFA	76.5	nonsynonymous SNV	chr8	51442745	A	G	SNTG1	SNTG1:NM_001287814:exon9:c.475A>G:p.S159G,SNTG1:NM_018967:exon10:c.475A>G:p.S159G,SNTG1:NM_001287813:exon11:c.475A>G:p.S159G
verified	105	HFA	77	nonsynonymous SNV	chr2	27676270	G	A	IFT172	IFT172:NM_015662:exon35:c.3932C>T:p.A1311V
verified	105	HFA	77	frameshift insertion	chr17	8170373	G	GT	PFAS	PFAS:NM_012393:exon24:c.2996dupT:p.V999fs
verified	105	HFA	77	frameshift insertion	chr19	1119928	C	CG	SBNO2	SBNO2:NM_001100122:exon9:c.1072dupC:p.R358fs,SBNO2:NM_014963:exon12:c.1243dupC:p.R415fs
verified	107	HFA	72	NA	chr21	45527316	G	T	PWP2	NA
verified	109	HFA	83.2	nonsynonymous SNV	chr16	354375	G	A	AXIN1	AXIN1:NM_003502:exon5:c.1183C>T:p.R395C,AXIN1:NM_181050:exon5:c.1183C>T:p.R395C
verified	110	HFA	88	frameshift deletion	chr7	116380928	GC	G	MET	MET:NM_000245:exon5:c.1551delC:p.G517fs,MET:NM_001127500:exon5:c.1551delC:p.G517fs
verified	110	HFA	88	nonsynonymous SNV	chr3	170875259	C	T	TNIK	TNIK:NM_001161560:exon12:c.1211G>A:p.R404Q,TNIK:NM_001161561:exon12:c.1211G>A:p.R404Q,TNIK:NM_001161562:exon12:c.1211G>A:p.R404Q,TNIK:NM_001161563:exon12:c.1211G>A:p.R404Q,TNIK:NM_001161564:exon12:c.1211G>A:p.R404Q,TNIK:NM_001161565:exon12:c.1211G>A:p.R404Q,TNIK:NM_001161566:exon12:c.1211G>A:p.R404Q,TNIK:NM_015028:exon12:c.1211G>A:p.R404Q
verified	110	HFA	88	nonsynonymous SNV	chr9	136662918	C	G	VAV2	VAV2:NM_003371:exon9:c.835G>C:p.G279R,VAV2:NM_001134398:exon10:c.850G>C:p.G284R
verified	113	HFA	86.2	stopgain	chr12	48490195	G	A	SENP1	SENP1:NM_001267594:exon4:c.151C>T:p.Q51X,SENP1:NM_001267595:exon4:c.151C>T:p.Q51X
verified	114	HFA	105	nonsynonymous SNV	chr6	76024838	C	T	FILIP1	FILIP1:NM_001300866:exon5:c.710G>A:p.R237K,FILIP1:NM_015687:exon5:c.710G>A:p.R237K,FILIP1:NM_001289987:exon6:c.719G>A:p.R240K
verified	114	HFA	105	nonsynonymous SNV	chr17	20108300	G	C	SPECC1	SPECC1:NM_001033554:exon2:c.695G>C:p.G232A,SPECC1:NM_001033555:exon2:c.695G>C:p.G232A,SPECC1:NM_001243438:exon2:c.695G>C:p.G232A,SPECC1:NM_001033553:exon4:c.938G>C:p.G313A,SPECC1:NM_001243439:exon4:c.938G>C:p.G313A,SPECC1:NM_152904:exon4:c.938G>C:p.G313A
verified	115	HFA	101.5	nonsynonymous SNV	chr17	1637164	C	A	WDR81	WDR81:NM_001163673:exon7:c.1224C>A:p.H408Q,WDR81:NM_001163809:exon7:c.4833C>A:p.H1611Q,WDR81:NM_001163811:exon7:c.1152C>A:p.H384Q,WDR81:NM_152348:exon8:c.1680C>A:p.H560Q
verified	116	HFA	83.5	nonsynonymous SNV	chr7	87069660	A	T	ABCB4	ABCB4:NM_000443:exon13:c.1415T>A:p.I472N,ABCB4:NM_018849:exon13:c.1415T>A:p.I472N,ABCB4:NM_018850:exon13:c.1415T>A:p.I472N
verified	117	HFA	82.2	nonsynonymous SNV	chr1	158368481	T	C	OR10T2	OR10T2:NM_001004475:exon1:c.776A>G:p.Y259C
verified	117	HFA	82.2	nonsynonymous SNV	chr12	123489885	G	A	PITPNM2	PITPNM2:NM_001300801:exon6:c.854C>T:p.P285L,PITPNM2:NM_020845:exon6:c.854C>T:p.P285L
verified	118	HFA	72	nonsynonymous SNV	chr5	140552850	G	C	PCDHB7	PCDHB7:NM_018940:exon1:c.434G>C:p.S145T
verified	118	HFA	72	nonsynonymous SNV	chr20	8782772	C	A	PLCB1	PLCB1:NM_182734:exon32:c.3493C>A:p.P1165T
verified	119	HFA	79.6	nonsynonymous SNV	chr10	103870450	G	A	LDB1	LDB1:NM_001113407:exon6:c.361C>T:p.R121W,LDB1:NM_003893:exon6:c.253C>T:p.R85W
verified	120	HFA	81	nonframeshift deletion	chr10	112361829	TTAA	T	SMC3	SMC3:NM_005445:exon25:c.2999_3001del:p.1000_1001del
verified	121	HFA	97.5	nonsynonymous SNV	chr6	12161977	T	G	HIVEP1	HIVEP1:NM_002114:exon8:c.6793T>G:p.S2265A
verified	121	HFA	97.5	NA	chr6	28251531	A	AG	PGBD1	NA
verified	122	HFA	80.5	nonsynonymous SNV	chr13	48947545	G	A	RB1	RB1:NM_000321:exon12:c.1132G>A:p.V378I
verified	125	LFA	45	nonsynonymous SNV	chr16	855558	C	T	PRR25	PRR25:NM_001013638:exon1:c.116C>T:p.P39L
verified	126	LFA	42	nonsynonymous SNV	chr11	686904	T	A	DEAF1	DEAF1:NM_021008:exon5:c.758A>T:p.K253I
verified	126	LFA	42	nonsynonymous SNV	chr16	4924498	C	G	UBN1	UBN1:NM_001079514:exon15:c.2087C>G:p.P696R,UBN1:NM_001288656:exon15:c.2087C>G:p.P696R
verified	129	LFA	59	frameshift deletion	chr7	100285168	CA	C	GIGYF1	GIGYF1:NM_022574:exon4:c.332delT:p.L111fs
verified	135	LFA	47	nonsynonymous SNV	chr3	183029481	C	G	MCF2L2	MCF2L2:NM_015078:exon8:c.833G>C:p.S278T
verified	135	LFA	47	nonsynonymous SNV	chr19	5455809	G	A	ZNRF4	ZNRF4:NM_181710:exon1:c.307G>A:p.V103M
verified	136	LFA	43.5	nonsynonymous SNV	chr1	3555350	C	T	WRAP73	WRAP73:NM_017818:exon4:c.376G>A:p.V126M
verified	137	LFA	37.8	frameshift deletion	chr17	38289312	GT	G	MSL1	MSL1:NM_001012241:exon7:c.718delT:p.F240fs
verified	138	NA	NA	nonsynonymous SNV	chr19	11460836	G	A	CCDC159	CCDC159:NM_001080503:exon4:c.187G>A:p.E63K
verified	139	HFA	80	stoploss	chr19	4652440	T	A	TNFAIP8L1	TNFAIP8L1:NM_001167942:exon2:c.559T>A:p.X187R,TNFAIP8L1:NM_152362:exon2:c.559T>A:p.X187R
verified	141	HFA	74.4	nonsynonymous SNV	chr16	20328611	A	C	GP2	GP2:NM_001007242:exon7:c.899T>G:p.F300C,GP2:NM_001007241:exon8:c.908T>G:p.F303C,GP2:NM_001502:exon8:c.1340T>G:p.F447C,GP2:NM_001007240:exon9:c.1349T>G:p.F450C
verified	143	HFA	70	nonsynonymous SNV	chr1	156563324	T	C	APOA1BP	APOA1BP:NM_144772:exon5:c.641T>C:p.I214T
verified	144	HFA	95.25	nonsynonymous SNV	chr3	32761622	T	C	CNOT10	CNOT10:NM_001256741:exon8:c.761T>C:p.F254S,CNOT10:NM_001256742:exon8:c.941T>C:p.F314S,CNOT10:NM_015442:exon8:c.761T>C:p.F254S
verified	146	HFA	73.8	nonsynonymous SNV	chr3	12422821	G	A	PPARG	PPARG:NM_005037:exon3:c.227G>A:p.S76N,PPARG:NM_015869:exon3:c.311G>A:p.S104N,PPARG:NM_138711:exon4:c.227G>A:p.S76N,PPARG:NM_138712:exon4:c.227G>A:p.S76N
verified	149	HFA	107.5	nonsynonymous SNV	chr12	13061691	G	A	GPRC5A	GPRC5A:NM_003979:exon2:c.508G>A:p.A170T
verified	150	HFA	94.75	nonsynonymous SNV	chr2	106688342	G	A	C2orf40	C2orf40:NM_032411:exon2:c.122G>A:p.R41Q
verified	150	HFA	94.75	nonsynonymous SNV	chr6	117246778	T	C	RFX6	RFX6:NM_173560:exon16:c.1841T>C:p.L614P
verified	153	HFA	80	nonsynonymous SNV	chr6	33656178	A	G	ITPR3	ITPR3:NM_002224:exon48:c.6538A>G:p.N2180D
verified	159	HFA	88	nonsynonymous SNV	chr7	148526829	C	T	EZH2	EZH2:NM_152998:exon4:c.358G>A:p.G120R,EZH2:NM_001203247:exon5:c.475G>A:p.G159R,EZH2:NM_001203248:exon5:c.448G>A:p.G150R,EZH2:NM_001203249:exon5:c.448G>A:p.G150R,EZH2:NM_004456:exon5:c.475G>A:p.G159R
verified	160	HFA	88.2	nonsynonymous SNV	chr4	85741250	T	C	WDFY3	WDFY3:NM_014991:exon12:c.1681A>G:p.N561D
verified	161	HFA	80	nonsynonymous SNV	chr11	19164568	G	A	ZDHHC13	ZDHHC13:NM_019028:exon2:c.71G>A:p.R24Q
verified	163	HFA	82.5	nonsynonymous SNV	chr1	26449021	C	T	PDIK1L	PDIK1L:NM_001243532:exon3:c.979C>T:p.L327F,PDIK1L:NM_152835:exon3:c.979C>T:p.L327F,PDIK1L:NM_001243533:exon4:c.979C>T:p.L327F
verified	165	HFA	90.5	nonsynonymous SNV	chr8	144994115	C	T	PLEC	PLEC:NM_201378:exon32:c.9832G>A:p.V3278M,PLEC:NM_201379:exon32:c.9808G>A:p.V3270M,PLEC:NM_201380:exon32:c.10285G>A:p.V3429M,PLEC:NM_201381:exon32:c.9778G>A:p.V3260M,PLEC:NM_201382:exon32:c.9874G>A:p.V3292M,PLEC:NM_201383:exon32:c.9886G>A:p.V3296M,PLEC:NM_201384:exon32:c.9874G>A:p.V3292M,PLEC:NM_000445:exon33:c.9955G>A:p.V3319M
verified	165	HFA	90.5	nonsynonymous SNV	chr1	35824693	G	A	ZMYM4	ZMYM4:NM_005095:exon3:c.253G>A:p.V85I
verified	165	HFA	90.5	nonsynonymous SNV	chr19	52538574	G	C	ZNF432	ZNF432:NM_014650:exon5:c.358C>G:p.L120V
verified	167	HFA	105	nonsynonymous SNV	chr2	219328069	T	A	USP37	USP37:NM_020935:exon22:c.2487A>T:p.E829D
verified	168	HFA	74.5	nonsynonymous SNV	chr1	40702911	G	T	RLF	RLF:NM_012421:exon8:c.2537G>T:p.G846V
verified	170	HFA	84.5	NA	chr5	133326692	C	T	VDAC1	NA
verified	171	HFA	94	nonsynonymous SNV	chr6	43415483	G	A	ABCC10	ABCC10:NM_033450:exon16:c.3683G>A:p.R1228Q,ABCC10:NM_001198934:exon18:c.3767G>A:p.R1256Q
verified	172	HFA	90.2	frameshift deletion	chr2	84945466	TC	T	DNAH6	DNAH6:NM_001370:exon59:c.9751delC:p.L3251fs
verified	172	HFA	90.2	nonsynonymous SNV	chr2	116447285	C	T	DPP10	DPP10:NM_001004360:exon6:c.443C>T:p.A148V,DPP10:NM_001178034:exon6:c.476C>T:p.A159V,DPP10:NM_001178037:exon6:c.452C>T:p.A151V,DPP10:NM_020868:exon6:c.464C>T:p.A155V,DPP10:NM_001178036:exon7:c.314C>T:p.A105V
verified	176	HFA	73	nonsynonymous SNV	chr20	47858681	A	G	DDX27	DDX27:NM_017895:exon18:c.2147A>G:p.K716R
verified	177	HFA	82.75	nonsynonymous SNV	chr16	20856537	C	T	LOC81691	LOC81691:NM_001144924:exon17:c.2005C>T:p.P669S,LOC81691:NM_001199053:exon18:c.2098C>T:p.P700S,LOC81691:NM_030941:exon18:c.2098C>T:p.P700S
verified	178	HFA	77.6	nonsynonymous SNV	chr20	31041537	C	T	NOL4L	NOL4L:NM_080616:exon4:c.415G>A:p.D139N,NOL4L:NM_001256798:exon7:c.1147G>A:p.D383N
verified	179	HFA	86	frameshift deletion	chr11	8662648	TA	T	TRIM66	TRIM66:NM_014818:exon9:c.838delT:p.Y280fs
verified	179	HFA	86	nonsynonymous SNV	chr5	112903381	A	G	YTHDC2	YTHDC2:NM_022828:exon23:c.3079A>G:p.I1027V
verified	181	HFA	117	nonsynonymous SNV	chr16	31473517	G	A	ARMC5	ARMC5:NM_001105247:exon3:c.649G>A:p.V217M,ARMC5:NM_024742:exon3:c.649G>A:p.V217M,ARMC5:NM_001301820:exon4:c.745G>A:p.V249M,ARMC5:NM_001288767:exon5:c.934G>A:p.V312M
verified	181	HFA	117	nonsynonymous SNV	chrX	67283948	G	C	OPHN1	OPHN1:NM_002547:exon21:c.1906C>G:p.P636A
verified	181	HFA	117	nonsynonymous SNV	chr10	124008653	C	T	TACC2	TACC2:NM_206860:exon14:c.2786C>T:p.A929V,TACC2:NM_001291878:exon15:c.2822C>T:p.A941V,TACC2:NM_001291879:exon15:c.1523C>T:p.A508V,TACC2:NM_006997:exon15:c.2876C>T:p.A959V,TACC2:NM_001291876:exon18:c.8276C>T:p.A2759V,TACC2:NM_001291877:exon18:c.8423C>T:p.A2808V,TACC2:NM_206861:exon18:c.3080C>T:p.A1027V,TACC2:NM_206862:exon21:c.8642C>T:p.A2881V
verified	182	HFA	76	frameshift deletion	chrX	49646080	CCA	C	USP27X	USP27X:NM_001145073:exon1:c.1171_1172del:p.Q391fs
verified	183	HFA	73.25	nonsynonymous SNV	chr1	206905248	G	A	MAPKAPK2	MAPKAPK2:NM_004759:exon9:c.1043G>A:p.R348Q,MAPKAPK2:NM_032960:exon9:c.1043G>A:p.R348Q
verified	188	HFA	74	nonsynonymous SNV	chr9	135940030	C	G	CEL	CEL:NM_001807:exon3:c.230C>G:p.T77S
verified	188	HFA	74	frameshift deletion	chr9	135201716	CA	C	SETX	SETX:NM_015046:exon10:c.5268delT:p.F1756fs
verified	188	HFA	74	nonsynonymous SNV	chr12	51847363	C	T	SLC4A8	SLC4A8:NM_001039960:exon5:c.454C>T:p.R152C,SLC4A8:NM_001258401:exon5:c.295C>T:p.R99C,SLC4A8:NM_001258402:exon5:c.454C>T:p.R152C,SLC4A8:NM_001258403:exon5:c.295C>T:p.R99C,SLC4A8:NM_001267615:exon5:c.295C>T:p.R99C
verified	191	HFA	82	frameshift deletion	chr8	117671099	TGA	T	EIF3H	EIF3H:NM_003756:exon3:c.408_409del:p.S136fs
verified	191	HFA	82	nonsynonymous SNV	chr12	44782070	G	A	TMEM117	TMEM117:NM_001286212:exon7:c.848G>A:p.G283E,TMEM117:NM_001286213:exon7:c.728G>A:p.G243E,TMEM117:NM_032256:exon8:c.1160G>A:p.G387E
verified	192	HFA	71.8	nonsynonymous SNV	chr20	57478585	G	A	GNAS;GNAS	GNAS:NM_080426:exon3:c.215G>A:p.S72N,GNAS:NM_001077488:exon4:c.260G>A:p.S87N
verified	196	HFA	123	nonsynonymous SNV	chr12	53043730	C	T	KRT2	KRT2:NM_000423:exon3:c.829G>A:p.A277T
verified	199	HFA	104.5	nonsynonymous SNV	chr11	133807349	C	T	IGSF9B	IGSF9B:NM_001277285:exon5:c.601G>A:p.E201K
verified	199	HFA	104.5	nonsynonymous SNV	chr9	134305631	G	A	PRRC2B	PRRC2B:NM_013318:exon1:c.100G>A:p.A34T
verified	203	HFA	92	nonsynonymous SNV	chr3	14965634	G	T	FGD5	FGD5:NM_152536:exon17:c.4057G>T:p.A1353S
verified	204	HFA	99.5	nonsynonymous SNV	chr11	93523868	C	G	MED17	MED17:NM_004268:exon3:c.546C>G:p.D182E
verified	204	HFA	99.5	nonsynonymous SNV	chr15	83791610	A	G	TM6SF1	TM6SF1:NM_001144903:exon6:c.583A>G:p.N195D,TM6SF1:NM_023003:exon6:c.583A>G:p.N195D
verified	205	HFA	84.5	nonsynonymous SNV	chr19	7606246	A	G	PNPLA6	PNPLA6:NM_001166114:exon8:c.931A>G:p.M311V,PNPLA6:NM_001166111:exon10:c.958A>G:p.M320V,PNPLA6:NM_001166112:exon11:c.814A>G:p.M272V,PNPLA6:NM_001166113:exon11:c.814A>G:p.M272V,PNPLA6:NM_006702:exon11:c.814A>G:p.M272V
verified	207	HFA	74	nonsynonymous SNV	chr5	149431384	C	T	HMGXB3	HMGXB3:NM_014983:exon20:c.3508C>T:p.R1170W
verified	208	HFA	118	nonsynonymous SNV	chr22	36681789	C	T	MYH9	MYH9:NM_002473:exon37:c.5189G>A:p.R1730H
verified	211	HFA	88.5	stopgain	chr12	122460011	C	A	BCL7A	BCL7A:NM_001024808:exon1:c.14C>A:p.S5X,BCL7A:NM_020993:exon1:c.14C>A:p.S5X
verified	211	HFA	88.5	nonsynonymous SNV	chr6	153043081	G	A	MYCT1	MYCT1:NM_025107:exon2:c.401G>A:p.R134Q
verified	212	HFA	78.5	nonsynonymous SNV	chr1	245849970	G	A	KIF26B	KIF26B:NM_018012:exon12:c.3685G>A:p.V1229I
verified	212	HFA	78.5	nonsynonymous SNV	chr7	131866330	A	G	PLXNA4	PLXNA4:NM_020911:exon18:c.3302T>C:p.L1101P
verified	214	HFA	84	frameshift insertion	chr14	75230946	G	GC	YLPM1	YLPM1:NM_019589:exon1:c.755dupC:p.A252fs
verified	215	HFA	79.25	nonsynonymous SNV	chr22	18899168	A	C	DGCR6	DGCR6:NM_005675:exon5:c.629A>C:p.Q210P
verified	215	HFA	79.25	nonsynonymous SNV	chr1	29639092	G	A	PTPRU	PTPRU:NM_001195001:exon22:c.3092G>A:p.R1031H,PTPRU:NM_133178:exon22:c.3101G>A:p.R1034H,PTPRU:NM_005704:exon23:c.3131G>A:p.R1044H,PTPRU:NM_133177:exon23:c.3119G>A:p.R1040H
verified	215	HFA	79.25	stopgain	chr6	155450541	C	T	TIAM2	TIAM2:NM_012454:exon3:c.184C>T:p.R62X
verified	217	HFA	87	nonsynonymous SNV	chr17	45452151	G	C	EFCAB13	EFCAB13:NM_001195192:exon10:c.903G>C:p.K301N,EFCAB13:NM_152347:exon12:c.1191G>C:p.K397N
verified	217	HFA	87	nonsynonymous SNV	chr4	75023944	G	A	MTHFD2L	MTHFD2L:NM_001144978:exon1:c.89G>A:p.R30K
verified	218	HFA	100.5	nonsynonymous SNV	chr9	137019627	C	A	WDR5	WDR5:NM_052821:exon9:c.671C>A:p.P224Q,WDR5:NM_017588:exon10:c.671C>A:p.P224Q
verified	219	HFA	79.4	frameshift deletion	chr8	95877839	TC	T	INTS8	INTS8:NM_017864:exon17:c.2183delC:p.S728fs
verified	222	LFA	65.8	nonsynonymous SNV	chr7	98247114	G	T	NPTX2	NPTX2:NM_002523:exon1:c.341G>T:p.G114V
verified	224	LFA	52	nonsynonymous SNV	chr3	184082975	A	G	POLR2H	POLR2H:NM_001278698:exon3:c.212A>G:p.D71G,POLR2H:NM_001278699:exon3:c.104A>G:p.D35G,POLR2H:NM_001278700:exon3:c.104A>G:p.D35G,POLR2H:NM_001278714:exon3:c.212A>G:p.D71G,POLR2H:NM_001278715:exon3:c.104A>G:p.D35G,POLR2H:NM_006232:exon3:c.212A>G:p.D71G
verified	224	LFA	52	nonsynonymous SNV	chr10	64136293	C	T	ZNF365	ZNF365:NM_014951:exon2:c.341C>T:p.P114L,ZNF365:NM_199450:exon2:c.341C>T:p.P114L,ZNF365:NM_199451:exon2:c.341C>T:p.P114L
verified	227	LFA	67.6	nonsynonymous SNV	chr19	537147	G	A	CDC34	CDC34:NM_004359:exon4:c.497G>A:p.R166Q
verified	227	LFA	67.6	nonsynonymous SNV	chr4	1836604	C	T	LETM1	LETM1:NM_012318:exon5:c.844G>A:p.A282T
verified	228	LFA	60.25	nonsynonymous SNV	chr18	10773452	C	T	PIEZO2	PIEZO2:NM_022068:exon18:c.2668G>A:p.G890R
verified	231	LFA	45	nonsynonymous SNV	chr3	107524234	C	T	BBX	BBX:NM_001276286:exon17:c.1747C>T:p.R583C,BBX:NM_020235:exon17:c.2666C>T:p.P889L,BBX:NM_001142568:exon18:c.2756C>T:p.P919L
verified	231	LFA	45	nonsynonymous SNV	chr19	13136292	G	A	NFIX	NFIX:NM_001271043:exon2:c.509G>A:p.C170Y,NFIX:NM_001271044:exon2:c.461G>A:p.C154Y,NFIX:NM_002501:exon2:c.485G>A:p.C162Y
verified	232	LFA	59.25	nonsynonymous SNV	chr1	152323766	T	G	FLG2	FLG2:NM_001014342:exon3:c.6496A>C:p.T2166P
unverified	234	LFA	38	nonsynonymous SNV	chr17	38519257	C	T	GJD3	GJD3:NM_152219:exon1:c.811G>A:p.A271T
verified	235	LFA	60.8	nonsynonymous SNV	chr20	32246570	C	T	NECAB3	NECAB3:NM_031232:exon9:c.950G>A:p.R317H,NECAB3:NM_031231:exon10:c.848G>A:p.R283H
verified	235	LFA	60.8	nonsynonymous SNV	chr3	12458450	C	T	PPARG	PPARG:NM_005037:exon6:c.983C>T:p.T328I,PPARG:NM_015869:exon6:c.1067C>T:p.T356I,PPARG:NM_138711:exon7:c.983C>T:p.T328I,PPARG:NM_138712:exon7:c.983C>T:p.T328I
verified	238	LFA	49.6	nonsynonymous SNV	chr12	53453841	C	A	TNS2	TNS2:NM_015319:exon18:c.2446C>A:p.P816T,TNS2:NM_170754:exon18:c.2416C>A:p.P806T,TNS2:NM_198316:exon18:c.2044C>A:p.P682T
verified	241	LFA	59	frameshift insertion	chr14	21854054	G	GGA	CHD8	CHD8:NM_001170629:exon37:c.7463_7464insTC:p.S2488fs,CHD8:NM_020920:exon38:c.6626_6627insTC:p.S2209fs
verified	241	LFA	59	nonsynonymous SNV	chr17	3661113	C	T	ITGAE	ITGAE:NM_002208:exon9:c.907G>A:p.A303T
verified	243	LFA	61.8	nonsynonymous SNV	chr6	46797096	C	A	MEP1A	MEP1A:NM_005588:exon10:c.932C>A:p.A311D
verified	243	LFA	61.8	stopgain	chr21	32502582	G	A	TIAM1	TIAM1:NM_003253:exon26:c.3994C>T:p.R1332X
verified	244	LFA	46	nonsynonymous SNV	chrX	153296605	G	C	MECP2	MECP2:NM_001110792:exon3:c.710C>G:p.P237R,MECP2:NM_004992:exon4:c.674C>G:p.P225R,MECP2:NM_001316337:exon5:c.395C>G:p.P132R
verified	245	LFA	48.25	nonsynonymous SNV	chr16	57600545	A	G	ADGRG5	ADGRG5:NM_001304376:exon7:c.581A>G:p.E194G,ADGRG5:NM_153837:exon7:c.581A>G:p.E194G
verified	245	LFA	48.25	stopgain	chr13	20638671	C	T	ZMYM2	ZMYM2:NM_001190965:exon19:c.3118C>T:p.R1040X,ZMYM2:NM_197968:exon19:c.3118C>T:p.R1040X,ZMYM2:NM_001190964:exon20:c.3118C>T:p.R1040X,ZMYM2:NM_003453:exon20:c.3118C>T:p.R1040X
verified	247	LFA	56.5	stopgain	chr2	166237647	C	A	SCN2A	SCN2A:NM_001040143:exon24:c.4491C>A:p.Y1497X,SCN2A:NM_001040142:exon25:c.4491C>A:p.Y1497X,SCN2A:NM_021007:exon25:c.4491C>A:p.Y1497X
verified	250	LFA	60.25	nonsynonymous SNV	chrX	153296363	G	A	MECP2	MECP2:NM_001110792:exon3:c.952C>T:p.R318C,MECP2:NM_004992:exon4:c.916C>T:p.R306C,MECP2:NM_001316337:exon5:c.637C>T:p.R213C
verified	250	LFA	60.25	nonsynonymous SNV	chr8	100523347	C	G	VPS13B	VPS13B:NM_017890:exon29:c.4315C>G:p.L1439V,VPS13B:NM_152564:exon29:c.4240C>G:p.L1414V
verified	251	LFA	63.8	nonsynonymous SNV	chr21	43767690	G	C	TFF2	TFF2:NM_005423:exon3:c.281C>G:p.P94R
unverified	254	LFA	50.8	nonsynonymous SNV	chr17	36666933	A	G	ARHGAP23	ARHGAP23:NM_001199417:exon24:c.4201A>G:p.S1401G
verified	254	LFA	50.8	nonsynonymous SNV	chr19	42855816	C	T	MEGF8	MEGF8:NM_001410:exon17:c.2803C>T:p.R935W,MEGF8:NM_001271938:exon18:c.3004C>T:p.R1002W
verified	255	LFA	41.8	nonsynonymous SNV	chr3	50129532	G	A	RBM5	RBM5:NM_005778:exon3:c.74G>A:p.R25H
verified	256	LFA	53.5	nonsynonymous SNV	chr5	38947427	T	C	RICTOR	RICTOR:NM_001285440:exon32:c.3398A>G:p.Y1133C,RICTOR:NM_152756:exon32:c.4253A>G:p.Y1418C,RICTOR:NM_001285439:exon33:c.4325A>G:p.Y1442C
unverified	257	LFA	65	nonsynonymous SNV	chr18	56936420	G	T	RAX	RAX:NM_013435:exon3:c.857C>A:p.S286Y
verified	257	LFA	65	nonsynonymous SNV	chr1	1470812	T	C	TMEM240	TMEM240:NM_001114748:exon4:c.449A>G:p.E150G
verified	258	LFA	50.25	nonsynonymous SNV	chr11	48152070	G	T	PTPRJ	PTPRJ:NM_001098503:exon8:c.1417G>T:p.A473S,PTPRJ:NM_002843:exon8:c.1417G>T:p.A473S
verified	259	LFA	45	nonsynonymous SNV	chr2	220467214	G	A	STK11IP	STK11IP:NM_052902:exon6:c.463G>A:p.D155N
verified	260	LFA	49	nonsynonymous SNV	chr12	44915904	T	C	NELL2	NELL2:NM_001145108:exon18:c.2054A>G:p.D685G,NELL2:NM_001145109:exon18:c.2051A>G:p.D684G,NELL2:NM_001145107:exon19:c.2204A>G:p.D735G,NELL2:NM_001145110:exon19:c.2123A>G:p.D708G,NELL2:NM_006159:exon19:c.2054A>G:p.D685G
verified	260	LFA	49	nonsynonymous SNV	chr11	62762211	G	T	SLC22A8	SLC22A8:NM_001184736:exon7:c.650C>A:p.A217D,SLC22A8:NM_001184732:exon8:c.1019C>A:p.A340D,SLC22A8:NM_001184733:exon8:c.746C>A:p.A249D,SLC22A8:NM_004254:exon8:c.1019C>A:p.A340D
verified	260	LFA	49	nonsynonymous SNV	chr7	48045566	C	T	SUN3	SUN3:NM_001030019:exon6:c.577G>A:p.G193R,SUN3:NM_001284350:exon7:c.541G>A:p.G181R,SUN3:NM_152782:exon7:c.577G>A:p.G193R
verified	261	LFA	43.5	nonsynonymous SNV	chr3	52696171	T	C	PBRM1	PBRM1:NM_018313:exon5:c.506A>G:p.N169S
verified	262	LFA	60.4	nonsynonymous SNV	chr12	208328	C	T	IQSEC3	IQSEC3:NM_001170738:exon2:c.571C>T:p.H191Y
verified	262	LFA	60.4	nonsynonymous SNV	chr17	4027300	C	G	ZZEF1	ZZEF1:NM_015113:exon2:c.400G>C:p.E134Q
unverified	266	LFA	40	nonsynonymous SNV	chr7	6590691	G	T	GRID2IP	GRID2IP:NM_001145118:exon1:c.377C>A:p.P126Q
verified	267	HFA	71	nonsynonymous SNV	chr1	1564588	G	A	MIB2	MIB2:NM_001170688:exon16:c.2428G>A:p.G810S,MIB2:NM_001170689:exon16:c.2083G>A:p.G695S,MIB2:NM_001170686:exon17:c.2611G>A:p.G871S,MIB2:NM_001170687:exon17:c.2581G>A:p.G861S,MIB2:NM_080875:exon17:c.2623G>A:p.G875S
verified	268	LFA	68	nonsynonymous SNV	chr6	129618869	C	T	LAMA2	LAMA2:NM_000426:exon21:c.2896C>T:p.P966S,LAMA2:NM_001079823:exon21:c.2896C>T:p.P966S
verified	268	LFA	68	nonsynonymous SNV	chr19	33904512	G	A	PEPD	PEPD:NM_001166056:exon8:c.586C>T:p.R196C,PEPD:NM_001166057:exon8:c.517C>T:p.R173C,PEPD:NM_000285:exon10:c.709C>T:p.R237C
verified	269	HFA	71	nonsynonymous SNV	chr10	93776124	T	C	BTAF1	BTAF1:NM_003972:exon33:c.4612T>C:p.S1538P
verified	270	LFA	57.75	nonsynonymous SNV	chr8	145584011	A	G	SLC52A2	SLC52A2:NM_001253815:exon3:c.859A>G:p.N287D,SLC52A2:NM_001253816:exon3:c.859A>G:p.N287D,SLC52A2:NM_024531:exon3:c.859A>G:p.N287D
unverified	274	LFA	58.6	nonsynonymous SNV	chr10	99531577	G	A	SFRP5	SFRP5:NM_003015:exon1:c.14C>T:p.A5V
verified	275	LFA	61.25	nonsynonymous SNV	chr6	135265038	G	A	ALDH8A1	ALDH8A1:NM_001193480:exon2:c.205C>T:p.R69C,ALDH8A1:NM_022568:exon2:c.205C>T:p.R69C,ALDH8A1:NM_170771:exon2:c.205C>T:p.R69C
verified	275	LFA	61.25	nonsynonymous SNV	chr18	21140315	G	A	NPC1	NPC1:NM_000271:exon6:c.761C>T:p.P254L
verified	276	LFA	67.6	nonsynonymous SNV	chr1	31769486	T	C	SNRNP40	SNRNP40:NM_004814:exon1:c.113A>G:p.Q38R
verified	276	LFA	67.6	nonsynonymous SNV	chr12	11174912	C	G	TAS2R19	TAS2R19:NM_176888:exon1:c.259G>C:p.A87P
verified	281	LFA	47.4	nonsynonymous SNV	chr14	105353608	A	G	CEP170B	CEP170B:NM_015005:exon11:c.2822A>G:p.Q941R,CEP170B:NM_001112726:exon12:c.3032A>G:p.Q1011R
verified	283	LFA	67	nonsynonymous SNV	chr6	83834482	T	A	DOPEY1	DOPEY1:NM_001199942:exon13:c.1372T>A:p.L458I,DOPEY1:NM_015018:exon13:c.1399T>A:p.L467I
verified	284	LFA	65	nonsynonymous SNV	chr20	62163885	G	T	PTK6	PTK6:NM_005975:exon5:c.826C>A:p.L276I
verified	285	LFA	64	nonsynonymous SNV	chr1	197102546	G	A	ASPM	ASPM:NM_001206846:exon6:c.2353C>T:p.L785F,ASPM:NM_018136:exon6:c.2353C>T:p.L785F
verified	285	LFA	64	nonsynonymous SNV	chr8	59509982	T	C	NSMAF	NSMAF:NM_001144772:exon21:c.1849A>G:p.T617A,NSMAF:NM_003580:exon21:c.1756A>G:p.T586A
verified	287	LFA	54.4	nonsynonymous SNV	chr17	27934874	G	A	ANKRD13B	ANKRD13B:NM_152345:exon2:c.229G>A:p.E77K
verified	287	LFA	54.4	stopgain	chrX	153296471	G	A	MECP2	MECP2:NM_001110792:exon3:c.844C>T:p.R282X,MECP2:NM_004992:exon4:c.808C>T:p.R270X,MECP2:NM_001316337:exon5:c.529C>T:p.R177X
unverified	291	LFA	47.5	nonsynonymous SNV	chr12	132633425	C	T	NOC4L	NOC4L:NM_024078:exon9:c.886C>T:p.R296C
verified	291	LFA	47.5	nonsynonymous SNV	chr22	21119516	G	A	PI4KA	PI4KA:NM_058004:exon21:c.2446C>T:p.P816S
verified	293	LFA	40	frameshift deletion	chr13	38145566	CT	C	POSTN	POSTN:NM_001135935:exon17:c.2037delA:p.E679fs,POSTN:NM_001286665:exon17:c.2037delA:p.E679fs,POSTN:NM_006475:exon18:c.2118delA:p.E706fs
verified	295	LFA	40	nonsynonymous SNV	chr14	105350168	G	C	CEP170B	CEP170B:NM_015005:exon8:c.842G>C:p.G281A,CEP170B:NM_001112726:exon9:c.1052G>C:p.G351A
unverified	295	LFA	40	nonsynonymous SNV	chr6	166721141	A	G	PRR18	PRR18:NM_175922:exon1:c.490T>C:p.F164L
verified	295	LFA	40	stopgain	chr2	61447571	G	A	USP34	USP34:NM_014709:exon67:c.7921C>T:p.Q2641X
verified	300	LFA	58.2	frameshift insertion	chr1	202702769	C	CG	KDM5B	KDM5B:NM_006618:exon23:c.3668_3669insC:p.R1223fs,KDM5B:NM_001314042:exon24:c.3776_3777insC:p.R1259fs
verified	300	LFA	58.2	nonsynonymous SNV	chr1	6631258	C	A	TAS1R1	TAS1R1:NM_138697:exon2:c.481C>A:p.P161T,TAS1R1:NM_177540:exon2:c.481C>A:p.P161T
verified	301	LFA	62	nonsynonymous SNV	chr19	44981362	A	G	ZNF180	ZNF180:NM_001278508:exon4:c.1261T>C:p.F421L,ZNF180:NM_001288761:exon4:c.307T>C:p.F103L,ZNF180:NM_001288762:exon4:c.307T>C:p.F103L,ZNF180:NM_001278509:exon5:c.1255T>C:p.F419L,ZNF180:NM_001288759:exon5:c.1333T>C:p.F445L,ZNF180:NM_001291633:exon5:c.1255T>C:p.F419L,ZNF180:NM_013256:exon5:c.1336T>C:p.F446L,ZNF180:NM_001288760:exon7:c.307T>C:p.F103L
unverified	305	LFA	38.8	nonsynonymous SNV	chr1	53925323	A	C	DMRTB1	DMRTB1:NM_033067:exon1:c.197A>C:p.E66A
verified	305	LFA	38.8	nonsynonymous SNV	chr3	42572370	G	A	VIPR1	VIPR1:NM_001251884:exon6:c.592G>A:p.V198I,VIPR1:NM_001251885:exon7:c.655G>A:p.V219I,VIPR1:NM_004624:exon7:c.736G>A:p.V246I,VIPR1:NM_001251882:exon8:c.613G>A:p.V205I
unverified	306	LFA	43.4	nonsynonymous SNV	chr17	30593218	C	T	RHBDL3	RHBDL3:NM_138328:exon1:c.10C>T:p.H4Y
unverified	307	LFA	48.5	nonsynonymous SNV	chr18	2906967	G	T	EMILIN2	EMILIN2:NM_032048:exon5:c.2546G>T:p.G849V
unverified	307	LFA	48.5	nonsynonymous SNV	chr4	122872700	C	A	TRPC3	TRPC3:NM_001130698:exon1:c.136G>T:p.G46W
unverified	308	LFA	63.8	nonsynonymous SNV	chr16	66730413	C	G	CMTM4	CMTM4:NM_178818:exon1:c.16G>C:p.E6Q,CMTM4:NM_181521:exon1:c.16G>C:p.E6Q
verified	310	LFA	65	nonsynonymous SNV	chr20	31021653	C	T	ASXL1	ASXL1:NM_015338:exon11:c.1652C>T:p.T551I
verified	312	LFA	68.8	nonsynonymous SNV	chr1	36564360	C	T	COL8A2	COL8A2:NM_001294347:exon4:c.727G>A:p.G243R,COL8A2:NM_005202:exon4:c.922G>A:p.G308R
verified	313	LFA	68	nonsynonymous SNV	chr4	13383195	T	C	RAB28	RAB28:NM_001017979:exon5:c.415A>G:p.I139V,RAB28:NM_001159601:exon5:c.415A>G:p.I139V,RAB28:NM_004249:exon5:c.415A>G:p.I139V
verified	315	LFA	49.8	nonframeshift deletion	chr12	41374707	TCAGGCCCTC	T	CNTN1	CNTN1:NM_175038:exon14:c.1772_1777del:p.591_593del,CNTN1:NM_001843:exon16:c.1805_1810del:p.602_604del
verified	315	LFA	49.8	nonframeshift deletion	chr19	7619570	CATT	C	PNPLA6	PNPLA6:NM_001166114:exon21:c.2596_2598del:p.866_866del,PNPLA6:NM_001166111:exon23:c.2626_2628del:p.876_876del,PNPLA6:NM_001166112:exon23:c.2401_2403del:p.801_801del,PNPLA6:NM_001166113:exon24:c.2482_2484del:p.828_828del,PNPLA6:NM_006702:exon24:c.2482_2484del:p.828_828del
verified	317	LFA	44	nonsynonymous SNV	chr5	13716696	A	T	DNAH5	DNAH5:NM_001369:exon74:c.12809T>A:p.V4270D
verified	318	LFA	56.2	nonsynonymous SNV	chr1	907513	G	A	PLEKHN1	PLEKHN1:NM_001160184:exon9:c.884G>A:p.R295H,PLEKHN1:NM_032129:exon9:c.848G>A:p.R283H
verified	318	LFA	56.2	nonsynonymous SNV	chr19	2878037	G	A	ZNF556	ZNF556:NM_001300843:exon4:c.1078G>A:p.V360I,ZNF556:NM_024967:exon4:c.1081G>A:p.V361I
verified	319	LFA	39.75	nonsynonymous SNV	chr7	141921513	G	C	MGAM2	MGAM2:NM_001293626:exon48:c.7202G>C:p.S2401T
verified	319	LFA	39.75	nonsynonymous SNV	chr8	103372354	G	A	UBR5	UBR5:NM_001282873:exon5:c.331C>T:p.P111S,UBR5:NM_015902:exon5:c.331C>T:p.P111S
verified	320	LFA	33.4	nonsynonymous SNV	chrX	153296363	G	A	MECP2	MECP2:NM_001110792:exon3:c.952C>T:p.R318C,MECP2:NM_004992:exon4:c.916C>T:p.R306C,MECP2:NM_001316337:exon5:c.637C>T:p.R213C
verified	323	LFA	42.8	NA	chr12	52081004	G	A	SCN8A	NA
unverified	324	LFA	54.4	nonsynonymous SNV	chr4	123748063	C	T	FGF2	FGF2:NM_002006:exon1:c.133C>T:p.R45W
verified	324	LFA	54.4	nonsynonymous SNV	chr19	18271314	C	T	PIK3R2	PIK3R2:NM_005027:exon3:c.356C>T:p.S119F
verified	324	LFA	54.4	nonsynonymous SNV	chr19	17611405	A	G	SLC27A1	SLC27A1:NM_198580:exon9:c.1435A>G:p.S479G
verified	325	LFA	46.5	nonsynonymous SNV	chr6	40399870	C	T	LRFN2	LRFN2:NM_020737:exon2:c.983G>A:p.R328H
unverified	327	LFA	69.2	nonsynonymous SNV	chr11	74460389	G	A	RNF169	RNF169:NM_001098638:exon1:c.464G>A:p.R155K
verified	328	LFA	54.2	nonsynonymous SNV	chr2	211469942	A	C	CPS1	CPS1:NM_001122634:exon7:c.600A>C:p.E200D,CPS1:NM_001875:exon17:c.1953A>C:p.E651D,CPS1:NM_001122633:exon18:c.1971A>C:p.E657D
verified	328	LFA	54.2	nonsynonymous SNV	chr19	54377323	G	C	MYADM	MYADM:NM_001020818:exon2:c.540G>C:p.E180D,MYADM:NM_001290194:exon2:c.540G>C:p.E180D,MYADM:NM_001020819:exon3:c.540G>C:p.E180D,MYADM:NM_001020820:exon3:c.540G>C:p.E180D,MYADM:NM_001020821:exon3:c.540G>C:p.E180D,MYADM:NM_001290188:exon3:c.540G>C:p.E180D,MYADM:NM_001290189:exon3:c.540G>C:p.E180D,MYADM:NM_001290190:exon3:c.540G>C:p.E180D,MYADM:NM_001290191:exon3:c.540G>C:p.E180D,MYADM:NM_001290192:ex…
verified	329	LFA	54	frameshift deletion	chr3	41277958	CAG	C	CTNNB1	CTNNB1:NM_001098209:exon12:c.1923_1924del:p.T641fs,CTNNB1:NM_001098210:exon12:c.1923_1924del:p.T641fs,CTNNB1:NM_001904:exon12:c.1923_1924del:p.T641fs
verified	330	LFA	55.2	nonsynonymous SNV	chr10	114849270	C	G	TCF7L2	TCF7L2:NM_001146283:exon5:c.595C>G:p.Q199E
verified	333	LFA	64.4	nonsynonymous SNV	chr5	101794099	C	T	SLCO6A1	SLCO6A1:NM_001289004:exon5:c.932G>A:p.C311Y,SLCO6A1:NM_001289002:exon6:c.1118G>A:p.C373Y,SLCO6A1:NM_173488:exon6:c.1118G>A:p.C373Y
verified	335	LFA	40.8	nonsynonymous SNV	chr12	23998926	C	T	SOX5	SOX5:NM_001261415:exon3:c.442G>A:p.E148K,SOX5:NM_006940:exon3:c.472G>A:p.E158K,SOX5:NM_152989:exon6:c.433G>A:p.E145K,SOX5:NM_001261414:exon7:c.433G>A:p.E145K
verified	336	LFA	57.4	frameshift deletion	chr22	29533475	CCT	C	KREMEN1	KREMEN1:NM_001039570:exon6:c.778_779del:p.L260fs,KREMEN1:NM_032045:exon6:c.778_779del:p.L260fs
verified	337	LFA	68.2	nonsynonymous SNV	chr19	4548296	A	T	SEMA6B	SEMA6B:NM_032108:exon13:c.1433T>A:p.F478Y
verified	338	LFA	46.8	nonsynonymous SNV	chr9	38395794	G	A	ALDH1B1	ALDH1B1:NM_000692:exon2:c.49G>A:p.A17T
verified	340	LFA	57.4	nonsynonymous SNV	chr7	47937731	T	C	PKD1L1	PKD1L1:NM_138295:exon14:c.2125A>G:p.I709V
verified	340	LFA	57.4	nonsynonymous SNV	chr8	69009275	A	G	PREX2	PREX2:NM_024870:exon22:c.2392A>G:p.M798V,PREX2:NM_025170:exon22:c.2392A>G:p.M798V
verified	341	LFA	36	frameshift deletion	chr22	51160342	GAC	G	SHANK3	SHANK3:NM_033517:exon21:c.4040_4041del:p.D1347fs
verified	342	LFA	58.8	nonsynonymous SNV	chr16	69458662	T	A	CYB5B	CYB5B:NM_030579:exon1:c.76T>A:p.Y26N
verified	342	LFA	58.8	nonsynonymous SNV	chr17	79863006	G	A	PCYT2	PCYT2:NM_001256433:exon11:c.832C>T:p.R278C,PCYT2:NM_001256435:exon12:c.760C>T:p.R254C,PCYT2:NM_001282203:exon12:c.760C>T:p.R254C,PCYT2:NM_001282204:exon12:c.898C>T:p.R300C,PCYT2:NM_002861:exon12:c.994C>T:p.R332C,PCYT2:NM_001184917:exon13:c.1048C>T:p.R350C,PCYT2:NM_001256434:exon13:c.871C>T:p.R291C
verified	343	LFA	53	nonsynonymous SNV	chr17	33269839	T	C	CCT6B	CCT6B:NM_001193530:exon5:c.566A>G:p.N189S,CCT6B:NM_006584:exon6:c.701A>G:p.N234S
verified	344	LFA	61.2	nonsynonymous SNV	chr19	55798386	C	T	BRSK1	BRSK1:NM_032430:exon2:c.148C>T:p.L50F
verified	344	LFA	61.2	nonsynonymous SNV	chr12	119594407	G	A	SRRM4	SRRM4:NM_194286:exon13:c.1640G>A:p.R547H
verified	346	LFA	45.8	nonsynonymous SNV	chr8	24339687	G	C	ADAM7	ADAM7:NM_003817:exon9:c.738G>C:p.L246F
verified	348	LFA	37.4	nonsynonymous SNV	chr11	102575332	C	T	MMP27	MMP27:NM_022122:exon2:c.277G>A:p.V93M
unverified	350	LFA	65.8	nonsynonymous SNV	chr19	50832252	A	G	KCNC3	KCNC3:NM_004977:exon1:c.88T>C:p.S30P
verified	351	LFA	64.2	nonsynonymous SNV	chr5	159776497	T	C	C1QTNF2	C1QTNF2:NM_031908:exon3:c.671A>G:p.H224R
verified	352	LFA	52.4	nonsynonymous SNV	chr12	57033945	T	G	ATP5B	ATP5B:NM_001686:exon8:c.1106A>C:p.D369A
verified	352	LFA	52.4	stopgain	chr14	102510939	G	T	DYNC1H1	DYNC1H1:NM_001376:exon72:c.12910G>T:p.E4304X
verified	352	LFA	52.4	nonsynonymous SNV	chr11	2981055	G	T	NAP1L4	NAP1L4:NM_005969:exon9:c.691C>A:p.P231T
verified	353	LFA	58.6	nonsynonymous SNV	chr12	70960273	C	A	PTPRB	PTPRB:NM_001206971:exon12:c.2922G>T:p.Q974H,PTPRB:NM_002837:exon13:c.3192G>T:p.Q1064H,PTPRB:NM_001109754:exon15:c.3846G>T:p.Q1282H
verified	353	LFA	58.6	stopgain	chr9	35699374	G	A	TLN1	TLN1:NM_006289:exon51:c.6853C>T:p.Q2285X
unverified	354	LFA	59.4	nonsynonymous SNV	chr19	40719523	C	G	MAP3K10	MAP3K10:NM_002446:exon9:c.1937C>G:p.P646R
verified	354	LFA	59.4	nonsynonymous SNV	chr20	57767980	A	C	ZNF831	ZNF831:NM_178457:exon1:c.1906A>C:p.K636Q
verified	357	LFA	49.5	nonsynonymous SNV	chr17	49297791	C	T	MBTD1	MBTD1:NM_017643:exon4:c.188G>A:p.R63Q
verified	357	LFA	49.5	nonsynonymous SNV	chr2	235951736	G	A	SH3BP4	SH3BP4:NM_014521:exon4:c.2323G>A:p.A775T
verified	361	LFA	44.8	frameshift deletion	chr17	55196404	A	-	AKAP1
verified	362	LFA	59.8	nonsynonymous SNV	chr16	24582483	G	C	RBBP6	RBBP6:NM_018703:exon17:c.3994G>C:p.E1332Q,RBBP6:NM_006910:exon18:c.4096G>C:p.E1366Q
verified	363	LFA	46.6	nonsynonymous SNV	chr10	64573304	G	A	EGR2	EGR2:NM_000399:exon2:c.1094C>T:p.T365I,EGR2:NM_001136177:exon3:c.1094C>T:p.T365I,EGR2:NM_001136179:exon3:c.944C>T:p.T315I,EGR2:NM_001136178:exon4:c.1094C>T:p.T365I
unverified	363	LFA	46.6	nonsynonymous SNV	chr20	62680172	G	C	SOX18	SOX18:NM_018419:exon2:c.502C>G:p.L168V
verified	365	LFA	44	nonsynonymous SNV	chr1	226924183	G	A	ITPKB	ITPKB:NM_002221:exon2:c.977C>T:p.P326L
unverified	366	LFA	59.2	nonsynonymous SNV	chr9	133556932	G	T	PRDM12	PRDM12:NM_021619:exon5:c.980G>T:p.S327I
unverified	371	LFA	63.8	nonsynonymous SNV	chr19	48946959	G	A	GRIN2D	GRIN2D:NM_000836:exon13:c.3776G>A:p.G1259D
unverified	371	LFA	63.8	nonsynonymous SNV	chr19	39055666	A	G	RYR1	RYR1:NM_001042723:exon90:c.12677A>G:p.E4226G,RYR1:NM_000540:exon91:c.12692A>G:p.E4231G
verified	371	LFA	63.8	nonsynonymous SNV	chr3	55504241	C	A	WNT5A	WNT5A:NM_001256105:exon5:c.977G>T:p.G326V,WNT5A:NM_003392:exon5:c.1022G>T:p.G341V
verified	372	LFA	47	nonsynonymous SNV	chr22	21329043	G	A	AIFM3	AIFM3:NM_001018060:exon8:c.658G>A:p.D220N,AIFM3:NM_001146288:exon8:c.676G>A:p.D226N,AIFM3:NM_144704:exon8:c.658G>A:p.D220N
verified	372	LFA	47	nonsynonymous SNV	chr11	133789656	G	A	IGSF9B	IGSF9B:NM_001277285:exon18:c.3964C>T:p.P1322S
verified	372	LFA	47	NA	chr1	78207116	T	C	USP33	NA
verified	373	LFA	63.8	nonsynonymous SNV	chr10	49998004	T	G	WDFY4	WDFY4:NM_020945:exon22:c.4040T>G:p.I1347S
verified	375	LFA	66.2	stopgain	chr19	56538902	G	T	NLRP5	NLRP5:NM_153447:exon7:c.1303G>T:p.E435X
verified	376	NA	NA	stopgain	chr3	122525782	T	G	DIRC2	DIRC2:NM_032839:exon2:c.422T>G:p.L141X
verified	377	LFA	54.2	nonsynonymous SNV	chr10	91497576	G	A	KIF20B	KIF20B:NM_001284259:exon20:c.2978G>A:p.R993H,KIF20B:NM_016195:exon20:c.2858G>A:p.R953H
verified	377	LFA	54.2	NA	chr12	116420410	T	A	MED13L	NA
verified	378	LFA	43	frameshift deletion	chr2	166172242	GAA	G	SCN2A	SCN2A:NM_001040143:exon10:c.1646_1647del:p.E549fs,SCN2A:NM_001040142:exon11:c.1646_1647del:p.E549fs,SCN2A:NM_021007:exon11:c.1646_1647del:p.E549fs
verified	378	LFA	43	stopgain	chr19	53762176	T	A	VN1R2	VN1R2:NM_173856:exon1:c.548T>A:p.L183X
verified	379	LFA	60	nonsynonymous SNV	chr22	50728584	C	T	PLXNB2	PLXNB2:NM_012401:exon3:c.430G>A:p.V144M
verified	379	LFA	60	nonsynonymous SNV	chr2	179434987	A	T	TTN	TTN:NM_003319:exon154:c.48677T>A:p.L16226H,TTN:NM_133432:exon155:c.49052T>A:p.L16351H,TTN:NM_133437:exon155:c.49253T>A:p.L16418H,TTN:NM_133378:exon275:c.68168T>A:p.L22723H,TTN:NM_001256850:exon276:c.70949T>A:p.L23650H,TTN:NM_001267550:exon326:c.75872T>A:p.L25291H
verified	384	LFA	48	nonsynonymous SNV	chr2	218941241	G	A	RUFY4	RUFY4:NM_198483:exon10:c.1340G>A:p.R447Q
verified	385	LFA	55.5	nonsynonymous SNV	chr17	57760839	T	C	CLTC	CLTC:NM_001288653:exon26:c.4145T>C:p.M1382T,CLTC:NM_004859:exon26:c.4133T>C:p.M1378T
verified	386	LFA	57.5	nonsynonymous SNV	chr1	6184614	A	C	CHD5	CHD5:NM_015557:exon30:c.4502T>G:p.L1501R
verified	391	LFA	52	frameshift deletion	chr5	112176597	AAAAG	A	APC	APC:NM_001127511:exon14:c.5253_5256del:p.K1751fs,APC:NM_000038:exon16:c.5307_5310del:p.K1769fs,APC:NM_001127510:exon17:c.5307_5310del:p.K1769fs
verified	391	LFA	52	nonsynonymous SNV	chr8	146107004	G	A	ZNF250	ZNF250:NM_001109689:exon6:c.1564C>T:p.R522W,ZNF250:NM_021061:exon6:c.1579C>T:p.R527W
verified	396	LFA	69.5	nonsynonymous SNV	chr19	1434819	G	A	DAZAP1	DAZAP1:NM_018959:exon12:c.1132G>A:p.V378M
verified	398	LFA	58.6	nonsynonymous SNV	chr16	46858381	C	G	C16orf87	C16orf87:NM_001001436:exon2:c.80G>C:p.C27S
verified	398	LFA	58.6	stopgain	chr4	15589524	G	A	CC2D2A	CC2D2A:NM_001080522:exon33:c.4151G>A:p.W1384X
verified	398	LFA	58.6	nonsynonymous SNV	chr17	16285325	G	C	UBB	UBB:NM_001281716:exon2:c.104G>C:p.G35A,UBB:NM_001281717:exon2:c.104G>C:p.G35A,UBB:NM_001281718:exon2:c.104G>C:p.G35A,UBB:NM_001281719:exon2:c.104G>C:p.G35A,UBB:NM_001281720:exon2:c.104G>C:p.G35A,UBB:NM_018955:exon2:c.104G>C:p.G35A
verified	399	LFA	51.5	frameshift insertion	chr22	51159932	T	TG	SHANK3	SHANK3:NM_033517:exon21:c.3630dupG:p.L1210fs
verified	400	LFA	56	nonsynonymous SNV	chr5	73190347	A	T	ARHGEF28	ARHGEF28:NM_001244364:exon21:c.2849A>T:p.D950V,ARHGEF28:NM_001080479:exon29:c.3788A>T:p.D1263V,ARHGEF28:NM_001177693:exon29:c.3788A>T:p.D1263V
verified	400	LFA	56	nonsynonymous SNV	chr8	95479721	T	C	RAD54B	RAD54B:NM_001205262:exon2:c.47A>G:p.K16R,RAD54B:NM_012415:exon2:c.47A>G:p.K16R
verified	403	LFA	55.4	nonsynonymous SNV	chr12	57594233	C	G	LRP1	LRP1:NM_002332:exon63:c.10023C>G:p.C3341W
verified	405	LFA	42	nonsynonymous SNV	chr21	31692028	G	T	KRTAP26-1	KRTAP26-1:NM_203405:exon1:c.326C>A:p.P109Q
verified	407	LFA	51	nonsynonymous SNV	chr3	48200856	T	C	CDC25A	CDC25A:NM_201567:exon13:c.1292A>G:p.K431R,CDC25A:NM_001789:exon14:c.1412A>G:p.K471R
verified	407	LFA	51	nonsynonymous SNV	chr4	82027001	G	C	PRKG2	PRKG2:NM_001282481:exon11:c.769C>G:p.R257G,PRKG2:NM_001282482:exon11:c.682C>G:p.R228G,PRKG2:NM_001282483:exon11:c.589C>G:p.R197G,PRKG2:NM_001282480:exon12:c.769C>G:p.R257G,PRKG2:NM_001282485:exon16:c.1942C>G:p.R648G,PRKG2:NM_006259:exon16:c.2029C>G:p.R677G
verified	407	LFA	51	nonsynonymous SNV	chr2	166170174	C	T	SCN2A	SCN2A:NM_001040143:exon8:c.1079C>T:p.P360L,SCN2A:NM_001040142:exon9:c.1079C>T:p.P360L,SCN2A:NM_021007:exon9:c.1079C>T:p.P360L
verified	408	LFA	63	nonsynonymous SNV	chr15	34105154	C	A	RYR3	RYR3:NM_001243996:exon72:c.10333C>A:p.R3445S,RYR3:NM_001036:exon73:c.10348C>A:p.R3450S
verified	409	LFA	69.2	nonsynonymous SNV	chr8	8748386	T	C	MFHAS1	MFHAS1:NM_004225:exon1:c.2183A>G:p.H728R
verified	413	LFA	61.6	nonsynonymous SNV	chr14	24877726	C	G	NYNRIN	NYNRIN:NM_025081:exon3:c.850C>G:p.L284V
verified	413	LFA	61.6	nonsynonymous SNV	chr4	37904080	G	A	TBC1D1	TBC1D1:NM_001253912:exon2:c.364G>A:p.A122T,TBC1D1:NM_015173:exon2:c.364G>A:p.A122T
verified	415	LFA	42	nonsynonymous SNV	chr3	128780734	C	A	GP9	GP9:NM_000174:exon3:c.152C>A:p.A51D
verified	416	LFA	63	nonsynonymous SNV	chr11	122726543	C	A	CRTAM	CRTAM:NM_019604:exon5:c.631C>A:p.P211T
verified	416	LFA	63	nonsynonymous SNV	chr2	219747126	G	C	WNT10A	WNT10A:NM_025216:exon2:c.357G>C:p.E119D
verified	417	LFA	45	nonsynonymous SNV	chr1	120377497	T	A	NBPF7	NBPF7:NM_001047980:exon8:c.1157A>T:p.D386V
verified	417	LFA	45	nonsynonymous SNV	chr1	153279585	A	G	PGLYRP3	PGLYRP3:NM_052891:exon2:c.214T>C:p.S72P
verified	417	LFA	45	nonsynonymous SNV	chr16	31152043	T	A	PRSS36	PRSS36:NM_001258290:exon13:c.1922A>T:p.Y641F,PRSS36:NM_001258291:exon13:c.1937A>T:p.Y646F,PRSS36:NM_173502:exon13:c.1937A>T:p.Y646F
verified	418	LFA	60.75	frameshift deletion	chr11	1477582	CCA	C	BRSK2	BRSK2:NM_001256627:exon17:c.1674_1675del:p.P558fs,BRSK2:NM_001256629:exon17:c.1674_1675del:p.P558fs,BRSK2:NM_001256630:exon17:c.1812_1813del:p.P604fs,BRSK2:NM_001282218:exon17:c.1494_1495del:p.P498fs,BRSK2:NM_003957:exon17:c.1674_1675del:p.P558fs
verified	419	LFA	49.5	frameshift deletion	chr15	33905545	TTCCC	T	RYR3	RYR3:NM_001036:exon19:c.2327_2330del:p.F776fs,RYR3:NM_001243996:exon19:c.2327_2330del:p.F776fs
unverified	420	LFA	68.5	nonsynonymous SNV	chr14	99641251	C	A	BCL11B	BCL11B:NM_001282238:exon3:c.1706G>T:p.G569V,BCL11B:NM_022898:exon3:c.1709G>T:p.G570V,BCL11B:NM_001282237:exon4:c.1919G>T:p.G640V,BCL11B:NM_138576:exon4:c.1922G>T:p.G641V
verified	422	LFA	56.8	stopgain	chr18	31318938	G	T	ASXL3	ASXL3:NM_030632:exon11:c.1570G>T:p.E524X
verified	422	LFA	56.8	nonsynonymous SNV	chr4	146567162	G	A	MMAA	MMAA:NM_172250:exon4:c.587G>A:p.R196Q
verified	423	LFA	47.5	nonsynonymous SNV	chr16	81272569	A	C	BCO1	BCO1:NM_017429:exon1:c.56A>C:p.K19T
verified	423	LFA	47.5	nonsynonymous SNV	chr3	52852107	G	A	ITIH4	ITIH4:NM_001166449:exon18:c.2167C>T:p.R723C,ITIH4:NM_002218:exon20:c.2257C>T:p.R753C
verified	425	LFA	42	nonsynonymous SNV	chr7	50070817	T	C	ZPBP	ZPBP:NM_001159878:exon5:c.574A>G:p.K192E,ZPBP:NM_007009:exon5:c.577A>G:p.K193E
verified	427	LFA	67.4	nonsynonymous SNV	chr12	121175769	C	T	ACADS	ACADS:NM_000017:exon5:c.602C>T:p.T201M
verified	427	LFA	67.4	nonsynonymous SNV	chr1	205767104	C	T	SLC41A1	SLC41A1:NM_173854:exon7:c.920G>A:p.R307Q
verified	430	LFA	63.2	nonsynonymous SNV	chr5	176636962	A	G	NSD1	NSD1:NM_022455:exon5:c.1562A>G:p.H521R,NSD1:NM_172349:exon6:c.755A>G:p.H252R
verified	433	LFA	58.5	nonsynonymous SNV	chr7	92147191	A	G	PEX1	PEX1:NM_000466:exon5:c.638T>C:p.L213P,PEX1:NM_001282677:exon5:c.638T>C:p.L213P,PEX1:NM_001282678:exon5:c.14T>C:p.L5P
verified	434	LFA	66	nonsynonymous SNV	chr17	80047175	G	C	FASN	FASN:NM_004104:exon13:c.2051C>G:p.S684C
verified	434	LFA	66	nonsynonymous SNV	chr10	124266318	G	A	HTRA1	HTRA1:NM_002775:exon4:c.889G>A:p.V297M
unverified	434	LFA	66	nonsynonymous SNV	chr6	166721441	G	T	PRR18	PRR18:NM_175922:exon1:c.190C>A:p.L64M
unverified	434	LFA	66	stopgain	chr22	36424374	C	A	RBFOX2	RBFOX2:NM_001082578:exon1:c.100G>T:p.G34X,RBFOX2:NM_001082579:exon1:c.100G>T:p.G34X
verified	434	LFA	66	nonsynonymous SNV	chr8	142231796	G	A	SLC45A4	SLC45A4:NM_001080431:exon2:c.157C>T:p.L53F,SLC45A4:NM_001286646:exon2:c.310C>T:p.L104F,SLC45A4:NM_001286648:exon2:c.157C>T:p.L53F
verified	435	LFA	67.525	nonsynonymous SNV	chr6	144074941	A	G	PHACTR2	PHACTR2:NM_001100164:exon4:c.346A>G:p.I116V,PHACTR2:NM_001100165:exon4:c.346A>G:p.I116V,PHACTR2:NM_001100166:exon4:c.313A>G:p.I105V,PHACTR2:NM_014721:exon4:c.313A>G:p.I105V
verified	436	LFA	53.825	nonsynonymous SNV	chr14	95593063	T	C	DICER1	DICER1:NM_001195573:exon6:c.757A>G:p.I253V,DICER1:NM_001271282:exon7:c.757A>G:p.I253V,DICER1:NM_001291628:exon7:c.757A>G:p.I253V,DICER1:NM_177438:exon7:c.757A>G:p.I253V,DICER1:NM_030621:exon9:c.757A>G:p.I253V
verified	436	LFA	53.825	nonsynonymous SNV	chr17	42164017	C	T	HDAC5	HDAC5:NM_001015053:exon14:c.1976G>A:p.R659H,HDAC5:NM_005474:exon14:c.1973G>A:p.R658H
verified	436	LFA	53.825	nonsynonymous SNV	chr14	58737707	A	C	PSMA3	PSMA3:NM_002788:exon10:c.714A>C:p.K238N,PSMA3:NM_152132:exon10:c.693A>C:p.K231N
verified	436	LFA	53.825	nonsynonymous SNV	chr11	124955358	C	T	SLC37A2	SLC37A2:NM_001145290:exon15:c.1316C>T:p.T439I,SLC37A2:NM_198277:exon15:c.1316C>T:p.T439I
verified	436	LFA	53.825	nonsynonymous SNV	chr16	31094355	C	T	ZNF646	ZNF646:NM_014699:exon3:c.5441C>T:p.T1814M
verified	440	LFA	63	nonsynonymous SNV	chr7	128626800	G	A	TNPO3	TNPO3:NM_012470:exon12:c.1673C>T:p.A558V
verified	442	LFA	63.2	nonsynonymous SNV	chr8	145755969	G	C	ARHGAP39	ARHGAP39:NM_001308208:exon11:c.3089C>G:p.T1030S,ARHGAP39:NM_025251:exon11:c.3182C>G:p.T1061S,ARHGAP39:NM_001308207:exon12:c.3089C>G:p.T1030S
verified	444	LFA	63	nonsynonymous SNV	chr8	23290495	C	T	ENTPD4	ENTPD4:NM_001128930:exon13:c.1771G>A:p.A591T,ENTPD4:NM_004901:exon13:c.1795G>A:p.A599T
verified	447	LFA	45	nonsynonymous SNV	chr14	96730851	G	C	BDKRB1	BDKRB1:NM_000710:exon3:c.832G>C:p.V278L
verified	447	LFA	45	frameshift insertion	chr6	43308178	C	CA	ZNF318	ZNF318:NM_014345:exon10:c.3557dupT:p.L1186fs
verified	448	LFA	47	nonsynonymous SNV	chr15	42042530	A	C	MGA	MGA:NM_001080541:exon16:c.6098A>C:p.D2033A,MGA:NM_001164273:exon17:c.6725A>C:p.D2242A
unverified	449	LFA	48.75	nonsynonymous SNV	chr9	131940315	T	C	IER5L	IER5L:NM_203434:exon1:c.17A>G:p.D6G
verified	449	LFA	48.75	nonsynonymous SNV	chr19	36220952	C	T	KMT2B	KMT2B:NM_014727:exon23:c.5002C>T:p.R1668W
verified	449	LFA	48.75	nonsynonymous SNV	chr18	55104119	A	G	ONECUT2	ONECUT2:NM_004852:exon1:c.1171A>G:p.M391V
verified	449	LFA	48.75	nonsynonymous SNV	chr19	10570097	T	A	PDE4A	PDE4A:NM_006202:exon4:c.406T>A:p.W136R,PDE4A:NM_001111307:exon9:c.1123T>A:p.W375R,PDE4A:NM_001111308:exon9:c.1045T>A:p.W349R,PDE4A:NM_001111309:exon9:c.940T>A:p.W314R,PDE4A:NM_001243121:exon11:c.1057T>A:p.W353R
verified	451	LFA	44.6	nonsynonymous SNV	chr13	25840278	G	A	MTMR6	MTMR6:NM_004685:exon4:c.451C>T:p.R151W
verified	451	LFA	44.6	nonsynonymous SNV	chr2	71127834	G	T	VAX2	VAX2:NM_012476:exon1:c.83G>T:p.R28L
verified	452	LFA	45.28	nonsynonymous SNV	chr1	65874398	G	A	DNAJC6	DNAJC6:NM_001256864:exon17:c.2566G>A:p.G856R,DNAJC6:NM_014787:exon17:c.2395G>A:p.G799R,DNAJC6:NM_001256865:exon18:c.2356G>A:p.G786R
verified	456	LFA	67.4	nonsynonymous SNV	chr2	103095409	C	G	SLC9A4	SLC9A4:NM_001011552:exon2:c.368C>G:p.P123R
verified	458	LFA	43.5	stopgain	chr2	166172131	G	T	SCN2A	SCN2A:NM_001040143:exon10:c.1534G>T:p.E512X,SCN2A:NM_001040142:exon11:c.1534G>T:p.E512X,SCN2A:NM_021007:exon11:c.1534G>T:p.E512X
verified	463	LFA	65.25	nonsynonymous SNV	chr6	146256215	C	A	SHPRH	SHPRH:NM_001042683:exon13:c.2818G>T:p.V940L,SHPRH:NM_173082:exon13:c.2818G>T:p.V940L
verified	465	LFA	48	frameshift insertion	chr12	46298749	T	TGCTA	ARID2	ARID2:NM_152641:exon21:c.5396_5397insGCTA:p.V1799fs
verified	465	LFA	48	nonsynonymous SNV	chr16	23392048	C	T	SCNN1B	SCNN1B:NM_000336:exon13:c.1849C>T:p.P617S
verified	465	LFA	48	nonsynonymous SNV	chr9	124752031	C	T	TTLL11	TTLL11:NM_001139442:exon4:c.982G>A:p.D328N,TTLL11:NM_194252:exon4:c.982G>A:p.D328N
verified	466	LFA	35.8	stopgain	chr6	33411228	C	T	SYNGAP1
verified	468	HFA	87	nonsynonymous SNV	chr9	135977404	G	A	RALGDS	RALGDS:NM_001042368:exon15:c.1967C>T:p.S656L,RALGDS:NM_001271774:exon15:c.2045C>T:p.S682L,RALGDS:NM_001271775:exon15:c.2129C>T:p.S710L,RALGDS:NM_001271776:exon15:c.2096C>T:p.S699L,RALGDS:NM_006266:exon15:c.2132C>T:p.S711L
verified	468	HFA	87	nonsynonymous SNV	chr13	99362007	C	T	SLC15A1	SLC15A1:NM_005073:exon13:c.967G>A:p.D323N
verified	469	LFA	56	nonsynonymous SNV	chr19	39804773	G	C	LRFN1	LRFN1:NM_020862:exon1:c.1204C>G:p.P402A
verified	470	LFA	52	nonsynonymous SNV	chr12	51236907	C	T	TMPRSS12	TMPRSS12:NM_182559:exon1:c.160C>T:p.R54W
unverified	472	HFA	118.5	nonsynonymous SNV	chr4	15005577	C	A	CPEB2	CPEB2:NM_001177381:exon1:c.1280C>A:p.P427Q,CPEB2:NM_001177382:exon1:c.1280C>A:p.P427Q,CPEB2:NM_001177383:exon1:c.1280C>A:p.P427Q,CPEB2:NM_001177384:exon1:c.1280C>A:p.P427Q,CPEB2:NM_182485:exon1:c.1280C>A:p.P427Q,CPEB2:NM_182646:exon1:c.1280C>A:p.P427Q
verified	473	LFA	64.4	nonsynonymous SNV	chr3	99567701	C	T	FILIP1L	FILIP1L:NM_001282794:exon2:c.2099G>A:p.G700D,FILIP1L:NM_014890:exon2:c.2099G>A:p.G700D,FILIP1L:NM_001282793:exon3:c.1547G>A:p.G516D,FILIP1L:NM_001042459:exon5:c.2819G>A:p.G940D,FILIP1L:NM_182909:exon5:c.2819G>A:p.G940D
verified	475	LFA	55.5	nonsynonymous SNV	chr8	21938634	A	G	DMTN	DMTN:NM_001114139:exon13:c.893A>G:p.Y298C,DMTN:NM_001302817:exon13:c.914A>G:p.Y305C,DMTN:NM_001114137:exon14:c.968A>G:p.Y323C,DMTN:NM_001114138:exon14:c.968A>G:p.Y323C,DMTN:NM_001302816:exon14:c.968A>G:p.Y323C,DMTN:NM_001114135:exon15:c.1034A>G:p.Y345C,DMTN:NM_001114136:exon15:c.1034A>G:p.Y345C,DMTN:NM_001978:exon15:c.1034A>G:p.Y345C
verified	475	LFA	55.5	nonsynonymous SNV	chr22	38477384	C	T	SLC16A8	SLC16A8:NM_013356:exon4:c.661G>A:p.E221K
verified	477	HFA	79.8	frameshift deletion	chr5	137902403	CCT	C	HSPA9	HSPA9:NM_004134:exon9:c.882_883del:p.T294fs
unverified	478	NA	NA	nonsynonymous SNV	chr9	137534068	C	T	COL5A1	COL5A1:NM_000093:exon1:c.35C>T:p.A12V,COL5A1:NM_001278074:exon1:c.35C>T:p.A12V
verified	480	LFA	58.25	nonsynonymous SNV	chr7	14741338	C	A	DGKB	DGKB:NM_004080:exon6:c.484G>T:p.D162Y,DGKB:NM_145695:exon6:c.484G>T:p.D162Y
verified	480	LFA	58.25	nonsynonymous SNV	chr8	142367588	C	T	GPR20	GPR20:NM_005293:exon2:c.436G>A:p.V146M
verified	480	LFA	58.25	NA	chr17	73812994	G	A	UNK	NA
verified	481	HFA	79.5	nonsynonymous SNV	chr1	237617829	C	A	RYR2	RYR2:NM_001035:exon15:c.1431C>A:p.N477K
verified	484	LFA	40.6	nonsynonymous SNV	chr17	48435595	C	T	XYLT2	XYLT2:NM_022167:exon10:c.1969C>T:p.R657C
unverified	487	HFA	73	nonsynonymous SNV	chr19	19774301	A	C	ATP13A1	ATP13A1:NM_020410:exon1:c.175T>G:p.L59V
verified	489	LFA	57	nonsynonymous SNV	chr19	33870452	C	T	CEBPG	CEBPG:NM_001252296:exon2:c.307C>T:p.R103W,CEBPG:NM_001806:exon2:c.307C>T:p.R103W
verified	489	LFA	57	nonsynonymous SNV	chr16	69352783	G	A	VPS4A	VPS4A:NM_013245:exon5:c.401G>A:p.G134E
verified	492	LFA	52.75	nonsynonymous SNV	chr13	61084793	T	A	TDRD3	TDRD3:NM_001146070:exon10:c.1045T>A:p.S349T,TDRD3:NM_001146071:exon10:c.766T>A:p.S256T,TDRD3:NM_030794:exon10:c.766T>A:p.S256T
verified	493	HFA	77.5	nonsynonymous SNV	chr19	18965994	C	T	UPF1	UPF1:NM_001297549:exon11:c.1520C>T:p.T507M,UPF1:NM_002911:exon11:c.1487C>T:p.T496M
verified	495	LFA	46	stopgain	chr18	31324211	C	T	ASXL3	ASXL3:NM_030632:exon12:c.4399C>T:p.R1467X
verified	495	LFA	46	nonsynonymous SNV	chr12	50410447	G	A	RACGAP1	RACGAP1:NM_001126104:exon2:c.52C>T:p.R18W,RACGAP1:NM_001126103:exon4:c.52C>T:p.R18W,RACGAP1:NM_013277:exon4:c.52C>T:p.R18W
verified	496	LFA	42	nonsynonymous SNV	chr7	134143805	G	C	AKR1B1	AKR1B1:NM_001628:exon1:c.10C>G:p.R4G
verified	498	HFA	71.5	nonsynonymous SNV	chr1	169391101	A	G	CCDC181	CCDC181:NM_001300969:exon3:c.568T>C:p.C190R,CCDC181:NM_021179:exon3:c.568T>C:p.C190R,CCDC181:NM_001300968:exon4:c.568T>C:p.C190R
verified	498	HFA	71.5	nonsynonymous SNV	chr1	151400680	T	G	POGZ	POGZ:NM_145796:exon4:c.493A>C:p.T165P,POGZ:NM_207171:exon4:c.619A>C:p.T207P,POGZ:NM_001194938:exon5:c.619A>C:p.T207P,POGZ:NM_001194937:exon6:c.778A>C:p.T260P,POGZ:NM_015100:exon6:c.778A>C:p.T260P
verified	501	LFA	42	nonsynonymous SNV	chr19	48631238	C	T	LIG1	LIG1:NM_001289064:exon18:c.1657G>A:p.E553K,LIG1:NM_001289063:exon19:c.1768G>A:p.E590K,LIG1:NM_000234:exon20:c.1861G>A:p.E621K
verified	503	HFA	87.5	nonsynonymous SNV	chr14	45705143	C	T	MIS18BP1	MIS18BP1:NM_018353:exon6:c.1222G>A:p.V408I
unverified	509	LFA	48.5	nonsynonymous SNV	chr12	122064754	A	G	ORAI1	ORAI1:NM_032790:exon1:c.107A>G:p.D36G
verified	517	HFA	75.6	nonsynonymous SNV	chr16	87795586	C	A	KLHDC4	KLHDC4:NM_001184856:exon2:c.160G>T:p.V54L,KLHDC4:NM_017566:exon2:c.160G>T:p.V54L
verified	519	HFA	92.5	nonsynonymous SNV	chr17	26961723	C	G	KIAA0100	KIAA0100:NM_014680:exon16:c.2882G>C:p.R961P
verified	519	HFA	92.5	nonframeshift deletion	chr11	1016003	AGAG	A	MUC6	MUC6:NM_005961:exon31:c.6795_6797del:p.2265_2266del
verified	519	HFA	92.5	nonsynonymous SNV	chr11	118235826	T	C	UBE4A	UBE4A:NM_001204077:exon2:c.31T>C:p.S11P,UBE4A:NM_004788:exon2:c.31T>C:p.S11P
unverified	520	LFA	61	nonsynonymous SNV	chr19	1469568	G	A	APC2	APC2:NM_005883:exon15:c.6268G>A:p.A2090T
verified	523	LFA	51	nonsynonymous SNV	chr16	57004980	T	A	CETP	CETP:NM_000078:exon6:c.563T>A:p.I188N,CETP:NM_001286085:exon6:c.563T>A:p.I188N
unverified	523	LFA	51	nonsynonymous SNV	chr19	50155477	C	G	SCAF1	SCAF1:NM_021228:exon7:c.1831C>G:p.R611G
verified	524	LFA	50	nonsynonymous SNV	chr12	6925209	T	A	CD4	CD4:NM_001195014:exon4:c.58T>A:p.F20I
verified	524	LFA	50	nonsynonymous SNV	chr20	40102026	T	C	CHD6	CHD6:NM_032221:exon17:c.2600A>G:p.N867S
verified	524	LFA	50	nonsynonymous SNV	chr10	68940206	C	T	CTNNA3	CTNNA3:NM_001127384:exon7:c.916G>A:p.A306T,CTNNA3:NM_013266:exon7:c.916G>A:p.A306T,CTNNA3:NM_001291133:exon8:c.952G>A:p.A318T
verified	524	LFA	50	nonsynonymous SNV	chr5	176893773	A	T	DBN1	DBN1:NM_004395:exon8:c.771T>A:p.F257L,DBN1:NM_080881:exon9:c.777T>A:p.F259L
verified	524	LFA	50	nonsynonymous SNV	chr2	173356022	T	G	ITGA6	ITGA6:NM_000210:exon22:c.2852T>G:p.I951S,ITGA6:NM_001079818:exon22:c.2852T>G:p.I951S,ITGA6:NM_001316306:exon22:c.2495T>G:p.I832S
verified	524	LFA	50	nonsynonymous SNV	chr3	49936349	C	T	MST1R	MST1R:NM_001244937:exon3:c.1499G>A:p.R500Q,MST1R:NM_002447:exon3:c.1499G>A:p.R500Q
verified	525	LFA	48	nonsynonymous SNV	chr17	41903171	C	G	MPP3	MPP3:NM_001932:exon9:c.562G>C:p.G188R
verified	527	HFA	78	nonsynonymous SNV	chr19	2132486	T	C	AP3D1	AP3D1:NM_001261826:exon5:c.446A>G:p.N149S,AP3D1:NM_003938:exon5:c.446A>G:p.N149S
unverified	527	HFA	78	nonsynonymous SNV	chr22	38221296	G	C	GALR3	GALR3:NM_003614:exon2:c.926G>C:p.G309A
unverified	527	HFA	78	nonsynonymous SNV	chr7	130418740	A	G	KLF14	KLF14:NM_138693:exon1:c.121T>C:p.S41P
verified	527	HFA	78	nonsynonymous SNV	chr5	176710897	T	C	NSD1	NSD1:NM_022455:exon20:c.6119T>C:p.V2040A,NSD1:NM_172349:exon21:c.5312T>C:p.V1771A
verified	528	LFA	66.5	stopgain	chr5	111615990	C	A	EPB41L4A	EPB41L4A:NM_022140:exon3:c.235G>T:p.E79X
verified	528	LFA	66.5	nonsynonymous SNV	chr2	32429739	A	G	SLC30A6	SLC30A6:NM_001193515:exon10:c.659A>G:p.Y220C,SLC30A6:NM_001193514:exon11:c.746A>G:p.Y249C,SLC30A6:NM_017964:exon11:c.746A>G:p.Y249C,SLC30A6:NM_001193513:exon12:c.866A>G:p.Y289C
verified	532	LFA	66.25	frameshift deletion	chr19	40880494	ACCTGC	A	PLD3	PLD3:NM_001031696:exon10:c.987_991del:p.Y329fs,PLD3:NM_001291311:exon10:c.987_991del:p.Y329fs,PLD3:NM_012268:exon10:c.987_991del:p.Y329fs
verified	534	LFA	66.2	nonsynonymous SNV	chr3	142215952	G	C	ATR	ATR:NM_001184:exon33:c.5641C>G:p.L1881V
unverified	534	LFA	66.2	nonframeshift deletion	chr2	203500344	CGCT	C	FAM117B	FAM117B:NM_173511:exon1:c.435_437del:p.145_146del
verified	534	LFA	66.2	nonsynonymous SNV	chr10	91477395	G	A	KIF20B	KIF20B:NM_001284259:exon11:c.1187G>A:p.R396K,KIF20B:NM_016195:exon11:c.1187G>A:p.R396K
verified	534	LFA	66.2	nonsynonymous SNV	chr19	46345547	G	A	SYMPK	SYMPK:NM_004819:exon9:c.1048C>T:p.R350C
verified	538	HFA	101.5	nonframeshift deletion	chr17	7481720	AGAC	A	EIF4A1	EIF4A1:NM_001416:exon11:c.1138_1140del:p.380_380del
verified	539	HFA	93	nonsynonymous SNV	chr19	50155649	C	T	SCAF1	SCAF1:NM_021228:exon7:c.2003C>T:p.P668L
verified	542	LFA	62	nonsynonymous SNV	chr22	19951775	C	T	COMT	COMT:NM_007310:exon3:c.418C>T:p.L140F,COMT:NM_000754:exon5:c.568C>T:p.L190F,COMT:NM_001135161:exon5:c.568C>T:p.L190F,COMT:NM_001135162:exon5:c.568C>T:p.L190F
unverified	542	LFA	62	nonsynonymous SNV	chr5	178421782	C	A	GRM6	GRM6:NM_000843:exon1:c.164G>T:p.R55L
verified	543	LFA	50.8	frameshift insertion	chr1	186038898	G	GA	HMCN1	HMCN1:NM_031935:exon51:c.7984dupA:p.V2661fs
verified	544	HFA	82.5	nonsynonymous SNV	chr10	61831926	G	A	ANK3	ANK3:NM_020987:exon37:c.8713C>T:p.R2905C
verified	544	HFA	82.5	nonsynonymous SNV	chr2	189909934	G	A	COL5A2	COL5A2:NM_000393:exon47:c.3334C>T:p.P1112S
verified	544	HFA	82.5	nonsynonymous SNV	chrX	135288689	A	G	FHL1	FHL1:NM_001159699:exon2:c.146A>G:p.D49G,FHL1:NM_001159701:exon2:c.185A>G:p.D62G,FHL1:NM_001159704:exon2:c.98A>G:p.D33G,FHL1:NM_001159700:exon3:c.98A>G:p.D33G,FHL1:NM_001159702:exon3:c.98A>G:p.D33G,FHL1:NM_001159703:exon3:c.98A>G:p.D33G,FHL1:NM_001167819:exon3:c.98A>G:p.D33G,FHL1:NM_001449:exon3:c.98A>G:p.D33G
verified	544	HFA	82.5	stopgain	chr17	17699527	C	T	RAI1	RAI1:NM_030665:exon3:c.3265C>T:p.R1089X
verified	551	LFA	67.8	nonsynonymous SNV	chr4	47901030	A	G	NFXL1	NFXL1:NM_001278623:exon7:c.934T>C:p.C312R,NFXL1:NM_001278624:exon7:c.934T>C:p.C312R,NFXL1:NM_152995:exon7:c.934T>C:p.C312R
verified	556	HFA	71.2	nonsynonymous SNV	chr1	172579305	C	T	SUCO	SUCO:NM_001282751:exon22:c.1982C>T:p.S661L,SUCO:NM_001282750:exon23:c.2558C>T:p.S853L,SUCO:NM_016227:exon23:c.4124C>T:p.S1375L,SUCO:NM_014283:exon24:c.3671C>T:p.S1224L
verified	558	LFA	43.5	nonsynonymous SNV	chr3	138183200	T	C	ESYT3	ESYT3:NM_031913:exon9:c.929T>C:p.V310A
verified	558	LFA	43.5	nonframeshift deletion	chr5	67522828	GAAC	G	PIK3R1	PIK3R1:NM_181523:exon2:c.326_328del:p.109_110del
verified	558	LFA	43.5	nonsynonymous SNV	chr2	219602991	G	A	TTLL4	TTLL4:NM_014640:exon3:c.592G>A:p.A198T
verified	562	HFA	98	nonsynonymous SNV	chr6	138655729	A	C	ARFGEF3	ARFGEF3:NM_020340:exon33:c.5746A>C:p.I1916L
verified	562	HFA	98	nonsynonymous SNV	chr1	112270279	C	T	FAM212B	FAM212B:NM_019099:exon2:c.205G>A:p.G69S,FAM212B:NM_198926:exon2:c.160G>A:p.G54S
unverified	563	HFA	84	nonsynonymous SNV	chr16	216380	C	T	HBM	HBM:NM_001003938:exon2:c.206C>T:p.A69V
unverified	565	LFA	34.4	nonsynonymous SNV	chr4	3076671	C	A	HTT	HTT:NM_002111:exon1:c.119C>A:p.P40Q
verified	565	LFA	34.4	nonsynonymous SNV	chr1	54483090	C	A	LDLRAD1	LDLRAD1:NM_001010978:exon2:c.32G>T:p.G11V,LDLRAD1:NM_001276393:exon2:c.32G>T:p.G11V,LDLRAD1:NM_001276394:exon2:c.32G>T:p.G11V,LDLRAD1:NM_001276395:exon2:c.32G>T:p.G11V
verified	566	HFA	75	nonsynonymous SNV	chr2	111419308	T	A	BUB1	BUB1:NM_001278616:exon9:c.1008A>T:p.R336S,BUB1:NM_001278617:exon10:c.1068A>T:p.R356S,BUB1:NM_004336:exon10:c.1068A>T:p.R356S
verified	567	HFA	72.4	nonsynonymous SNV	chr13	111102789	C	T	COL4A2	COL4A2:NM_001846:exon20:c.1327C>T:p.P443S
verified	567	HFA	72.4	nonsynonymous SNV	chr8	96037396	G	T	NDUFAF6	NDUFAF6:NM_152416:exon1:c.160G>T:p.A54S
verified	568	HFA	71.2	nonsynonymous SNV	chr14	93154517	T	C	RIN3	RIN3:NM_024832:exon10:c.2878T>C:p.Y960H
unverified	569	HFA	70	nonsynonymous SNV	chr16	86612907	C	A	FOXL1	FOXL1:NM_005250:exon1:c.578C>A:p.P193H
verified	570	HFA	90.6	nonsynonymous SNV	chr11	65123301	A	C	TIGD3	TIGD3:NM_145719:exon2:c.22A>C:p.K8Q
unverified	571	NA	NA	stopgain	chr12	96704853	G	A	CDK17	CDK17:NM_001170464:exon5:c.520C>T:p.R174X,CDK17:NM_002595:exon5:c.520C>T:p.R174X
unverified	576	LFA	41.8	nonsynonymous SNV	chr10	22292236	G	A	DNAJC1	DNAJC1:NM_022365:exon1:c.128C>T:p.A43V
unverified	576	LFA	41.8	nonframeshift deletion	chr16	89807249	GAGA	G	FANCA	FANCA:NM_000135:exon38:c.3788_3790del:p.1263_1264del,FANCA:NM_001286167:exon38:c.3788_3790del:p.1263_1264del
unverified	576	LFA	41.8	nonsynonymous SNV	chr3	178951994	G	C	PIK3CA	PIK3CA:NM_006218:exon21:c.3049G>C:p.D1017H
unverified	576	LFA	41.8	nonsynonymous SNV	chr2	170684247	C	G	UBR3	UBR3:NM_172070:exon1:c.230C>G:p.A77G
verified	586	LFA	47	nonsynonymous SNV	chr16	23690303	C	G	PLK1	PLK1:NM_005030:exon1:c.50C>G:p.P17R
verified	594	LFA	67.25	nonsynonymous SNV	chr20	51871887	G	C	TSHZ2	TSHZ2:NM_001193421:exon2:c.1881G>C:p.E627D,TSHZ2:NM_173485:exon2:c.1890G>C:p.E630D
verified	611	HFA	86.5	nonsynonymous SNV	chr19	30165468	C	T	PLEKHF1	PLEKHF1:NM_024310:exon2:c.722C>T:p.A241V
verified	613	HFA	88.5	frameshift deletion	chr16	89348325	TTTTC	T	ANKRD11	ANKRD11:NM_001256183:exon9:c.4621_4624del:p.E1541fs,ANKRD11:NM_013275:exon9:c.4621_4624del:p.E1541fs,ANKRD11:NM_001256182:exon10:c.4621_4624del:p.E1541fs
verified	614	LFA	21.6	nonsynonymous SNV	chr13	37678912	G	A	CSNK1A1L	CSNK1A1L:NM_145203:exon1:c.482C>T:p.A161V
verified	614	LFA	21.6	nonsynonymous SNV	chr17	78188441	C	T	SGSH	SGSH:NM_000199:exon4:c.479G>A:p.R160Q
verified	621	LFA	54.2	frameshift deletion	chr12	29604291	CTTACTGTGTCTTTCTT	C	OVCH1	OVCH1:NM_183378:exon22:c.2726_2741del:p.E909fs
verified	624	LFA	40.5	nonsynonymous SNV	chr10	70760259	A	G	KIAA1279	KIAA1279:NM_015634:exon2:c.506A>G:p.Y169C
verified	625	LFA	25.6	NA	chr9	16870629	GTGGAAACTTCTTAC	G	BNC2	NA
verified	625	LFA	25.6	NA	chr16	10031815	C	T	GRIN2A	NA
verified	625	LFA	25.6	nonsynonymous SNV	chr4	494364	C	T	PIGG	PIGG:NM_001127178:exon2:c.334C>T:p.P112S,PIGG:NM_001289051:exon2:c.67C>T:p.P23S,PIGG:NM_001289052:exon2:c.334C>T:p.P112S,PIGG:NM_001289053:exon2:c.67C>T:p.P23S,PIGG:NM_001289057:exon2:c.67C>T:p.P23S,PIGG:NM_017733:exon2:c.334C>T:p.P112S
verified	627	LFA	67.2	nonsynonymous SNV	chr8	145745959	C	T	LRRC14	LRRC14:NM_014665:exon3:c.667C>T:p.R223C,LRRC14:NM_001272036:exon4:c.667C>T:p.R223C
verified	627	LFA	67.2	stopgain	chr15	65938039	C	T	SLC24A1	SLC24A1:NM_001254740:exon3:c.211C>T:p.Q71X,SLC24A1:NM_001301032:exon4:c.2176C>T:p.Q726X,SLC24A1:NM_001301031:exon5:c.2230C>T:p.Q744X,SLC24A1:NM_004727:exon6:c.2230C>T:p.Q744X,SLC24A1:NM_001301033:exon7:c.2176C>T:p.Q726X
verified	630	HFA	84.5	nonsynonymous SNV	chr2	210832223	G	T	UNC80	UNC80:NM_032504:exon51:c.7670G>T:p.S2557I,UNC80:NM_182587:exon51:c.7655G>T:p.S2552I
unverified	631	HFA	70.6	nonsynonymous SNV	chr19	10401846	C	T	ICAM5	ICAM5:NM_003259:exon2:c.181C>T:p.R61W
unverified	631	HFA	70.6	nonsynonymous SNV	chrX	102632541	G	T	NGFRAP1	NGFRAP1:NM_014380:exon1:c.122G>T:p.R41L,NGFRAP1:NM_001282674:exon2:c.362G>T:p.R121L,NGFRAP1:NM_206915:exon3:c.122G>T:p.R41L,NGFRAP1:NM_206917:exon3:c.92G>T:p.R31L
unverified	631	HFA	70.6	nonsynonymous SNV	chr14	38208168	T	C	TTC6	TTC6:NM_001310135:exon12:c.2219T>C:p.I740T
verified	635	LFA	53	stopgain	chr14	95054224	T	G	SERPINA5	SERPINA5:NM_000624:exon3:c.525T>G:p.Y175X
verified	637	HFA	87	nonsynonymous SNV	chr14	23821328	A	T	SLC22A17	SLC22A17:NM_020372:exon1:c.96T>A:p.N32K,SLC22A17:NM_016609:exon2:c.96T>A:p.N32K
verified	637	HFA	87	nonsynonymous SNV	chr11	92930973	G	C	SLC36A4	SLC36A4:NM_152313:exon1:c.26C>G:p.A9G
verified	638	LFA	54	nonsynonymous SNV	chr1	180064727	C	T	CEP350	CEP350:NM_014810:exon35:c.8581C>T:p.R2861W
verified	638	LFA	54	nonsynonymous SNV	chr19	6475317	C	A	DENND1C	DENND1C:NM_001290331:exon12:c.889G>T:p.G297W,DENND1C:NM_024898:exon14:c.1021G>T:p.G341W
verified	638	LFA	54	nonsynonymous SNV	chr2	29258377	A	C	FAM179A	FAM179A:NM_199280:exon17:c.2273A>C:p.Q758P
verified	639	LFA	68.2	nonsynonymous SNV	chr8	144997738	G	A	PLEC	PLEC:NM_201378:exon31:c.6317C>T:p.S2106L,PLEC:NM_201379:exon31:c.6293C>T:p.S2098L,PLEC:NM_201380:exon31:c.6770C>T:p.S2257L,PLEC:NM_201381:exon31:c.6263C>T:p.S2088L,PLEC:NM_201382:exon31:c.6359C>T:p.S2120L,PLEC:NM_201383:exon31:c.6371C>T:p.S2124L,PLEC:NM_201384:exon31:c.6359C>T:p.S2120L,PLEC:NM_000445:exon32:c.6440C>T:p.S2147L
verified	639	LFA	68.2	nonsynonymous SNV	chr19	1123017	C	T	SBNO2	SBNO2:NM_001100122:exon5:c.485G>A:p.R162H,SBNO2:NM_014963:exon8:c.656G>A:p.R219H
verified	639	LFA	68.2	nonsynonymous SNV	chr10	98945349	C	T	SLIT1	SLIT1:NM_003061:exon1:c.83G>A:p.R28H
unverified	642	LFA	67.75	nonsynonymous SNV	chr14	105417721	G	C	AHNAK2	AHNAK2:NM_138420:exon7:c.4067C>G:p.P1356R
verified	643	LFA	60.5	nonsynonymous SNV	chr3	51978830	G	A	PARP3	PARP3:NM_001003931:exon5:c.559G>A:p.V187M,PARP3:NM_005485:exon5:c.538G>A:p.V180M
unverified	646	LFA	45.2	nonsynonymous SNV	chr12	93100666	A	G	C12orf74	C12orf74:NM_001037671:exon2:c.259A>G:p.S87G,C12orf74:NM_001178097:exon2:c.259A>G:p.S87G
unverified	646	LFA	45.2	nonsynonymous SNV	chr1	52291027	G	T	NRDC	NRDC:NM_001101662:exon6:c.968C>A:p.A323E,NRDC:NM_001242361:exon8:c.776C>A:p.A259E,NRDC:NM_002525:exon8:c.1172C>A:p.A391E
verified	648	NA	NA	nonsynonymous SNV	chr19	17038870	C	T	CPAMD8	CPAMD8:NM_015692:exon25:c.3460G>A:p.V1154I
verified	653	LFA	53	nonsynonymous SNV	chr7	5399048	G	A	TNRC18	TNRC18:NM_001080495:exon15:c.4814C>T:p.S1605L
verified	658	LFA	42	frameshift deletion	chr17	7100104	TC	T	DLG4	DLG4:NM_001128827:exon9:c.1045delG:p.E349fs,DLG4:NM_001365:exon11:c.1183delG:p.E395fs
verified	658	LFA	42	nonsynonymous SNV	chr19	8997515	A	G	MUC16	MUC16:NM_024690:exon59:c.40907T>C:p.L13636P
verified	659	LFA	46	stopgain	chr17	17699527	C	T	RAI1	RAI1:NM_030665:exon3:c.3265C>T:p.R1089X
verified	661	LFA	42	nonsynonymous SNV	chr11	75153610	G	C	GDPD5	GDPD5:NM_030792:exon12:c.965C>G:p.T322R
verified	661	LFA	42	nonsynonymous SNV	chr20	61594706	G	A	SLC17A9	SLC17A9:NM_022082:exon6:c.710G>A:p.R237Q,SLC17A9:NM_001302643:exon7:c.692G>A:p.R231Q
verified	662	NA	NA	nonsynonymous SNV	chr1	155168236	G	A	THBS3	THBS3:NM_001252608:exon15:c.1678C>T:p.R560C,THBS3:NM_001252607:exon16:c.2011C>T:p.R671C,THBS3:NM_007112:exon17:c.2038C>T:p.R680C
verified	665	LFA	69.5	nonsynonymous SNV	chr19	56127613	C	G	ZNF865	ZNF865:NM_001195605:exon1:c.2629C>G:p.R877G
unverified	667	LFA	55	nonsynonymous SNV	chrX	153191643	C	A	ARHGAP4	ARHGAP4:NM_001164741:exon1:c.14G>T:p.G5V,ARHGAP4:NM_001666:exon1:c.14G>T:p.G5V
verified	668	LFA	46.5	stopgain	chr9	5090911	G	A	JAK2	JAK2:NM_004972:exon22:c.3059G>A:p.W1020X
verified	668	LFA	46.5	nonsynonymous SNV	chr11	20417409	A	G	PRMT3	PRMT3:NM_001145166:exon4:c.275A>G:p.E92G,PRMT3:NM_001145167:exon5:c.230A>G:p.E77G,PRMT3:NM_005788:exon6:c.461A>G:p.E154G
verified	668	LFA	46.5	nonsynonymous SNV	chr12	80943425	T	A	PTPRQ	PTPRQ:NM_001145026:exon22:c.3681T>A:p.N1227K
verified	668	LFA	46.5	nonsynonymous SNV	chr8	120744244	T	G	TAF2	TAF2:NM_003184:exon26:c.3520A>C:p.K1174Q
unverified	670	LFA	60.8	nonsynonymous SNV	chr1	27692863	G	A	MAP3K6	MAP3K6:NM_001297609:exon1:c.226C>T:p.R76C,MAP3K6:NM_004672:exon1:c.226C>T:p.R76C
verified	672	HFA	71.5	nonsynonymous SNV	chr5	156908893	C	T	ADAM19	ADAM19:NM_033274:exon22:c.2609G>A:p.R870H
verified	672	HFA	71.5	nonsynonymous SNV	chr1	236381830	G	T	ERO1B	ERO1B:NM_019891:exon16:c.1390C>A:p.Q464K
verified	672	HFA	71.5	nonsynonymous SNV	chr13	21563377	G	A	LATS2	LATS2:NM_014572:exon4:c.542C>T:p.A181V
verified	674	LFA	41.2	nonsynonymous SNV	chr11	104762014	A	C	CASP12	CASP12:NM_001191016:exon4:c.550T>G:p.W184G
verified	674	LFA	41.2	nonsynonymous SNV	chr10	871227	G	A	LARP4B	LARP4B:NM_015155:exon13:c.1262C>T:p.A421V
verified	674	LFA	41.2	nonsynonymous SNV	chr12	96104338	C	T	NTN4	NTN4:NM_021229:exon5:c.1061G>A:p.R354H
unverified	676	HFA	77	nonsynonymous SNV	chr10	124221299	C	T	HTRA1	HTRA1:NM_002775:exon1:c.131C>T:p.A44V
verified	677	LFA	27.25	nonsynonymous SNV	chr11	119030991	G	A	ABCG4	ABCG4:NM_001142505:exon13:c.1492G>A:p.A498T,ABCG4:NM_022169:exon13:c.1492G>A:p.A498T
verified	679	LFA	66.8	nonsynonymous SNV	chr19	54657519	A	G	CNOT3	CNOT3:NM_014516:exon17:c.2105A>G:p.Y702C
verified	682	HFA	83.125	nonsynonymous SNV	chr21	47975945	G	A	DIP2A	DIP2A:NM_001146116:exon29:c.3427G>A:p.D1143N,DIP2A:NM_015151:exon29:c.3439G>A:p.D1147N
verified	684	LFA	44	nonsynonymous SNV	chr1	43830619	T	G	ELOVL1	ELOVL1:NM_001256402:exon3:c.55A>C:p.N19H,ELOVL1:NM_001256399:exon4:c.298A>C:p.N100H,ELOVL1:NM_022821:exon4:c.298A>C:p.N100H
verified	685	HFA	75.5	stopgain	chr6	116599773	G	C	TSPYL1	TSPYL1:NM_003309:exon1:c.1221C>G:p.Y407X
verified	687	HFA	71	stopgain	chr10	35299248	G	GC	CUL2	CUL2:NM_001198777:exon21:c.2228_2229insG:p.Y743_V744delinsX,CUL2:NM_001198778:exon21:c.2285_2286insG:p.Y762_V763delinsX,CUL2:NM_001198779:exon21:c.2267_2268insG:p.Y756_V757delinsX,CUL2:NM_003591:exon21:c.2228_2229insG:p.Y743_V744delinsX
verified	689	HFA	73.25	nonsynonymous SNV	chr9	139396886	G	A	NOTCH1	NOTCH1:NM_017617:exon28:c.5222C>T:p.A1741V
verified	697	NA	NA	nonsynonymous SNV	chr13	24438311	G	T	MIPEP	MIPEP:NM_005932:exon8:c.961C>A:p.L321I
verified	697	NA	NA	stopgain	chr17	61466092	C	T	TANC2	TANC2:NM_025185:exon14:c.2566C>T:p.R856X
verified	699	LFA	69.2	nonsynonymous SNV	chr19	51294061	C	T	ACPT	ACPT:NM_033068:exon3:c.247C>T:p.R83C
verified	699	LFA	69.2	nonsynonymous SNV	chr20	8719978	G	A	PLCB1	PLCB1:NM_015192:exon21:c.2279G>A:p.R760H,PLCB1:NM_182734:exon21:c.2279G>A:p.R760H
verified	701	HFA	71.25	nonsynonymous SNV	chr8	145660489	C	T	TONSL	TONSL:NM_013432:exon19:c.2917G>A:p.G973R
verified	702	LFA	42	nonsynonymous SNV	chr6	10586293	G	A	GCNT2	GCNT2:NM_145655:exon1:c.71G>A:p.S24N
verified	702	LFA	42	stopgain	chr2	1946802	C	A	MYT1L	MYT1L:NM_001303052:exon9:c.457G>T:p.E153X,MYT1L:NM_015025:exon9:c.457G>T:p.E153X
verified	703	LFA	60.75	nonsynonymous SNV	chr1	43664264	C	T	CFAP57	CFAP57:NM_001167965:exon8:c.1375C>T:p.L459F,CFAP57:NM_001195831:exon8:c.1375C>T:p.L459F,CFAP57:NM_152498:exon8:c.1375C>T:p.L459F
verified	703	LFA	60.75	nonsynonymous SNV	chr14	86088600	G	A	FLRT2	FLRT2:NM_013231:exon2:c.742G>A:p.D248N
verified	703	LFA	60.75	nonsynonymous SNV	chr16	49557543	C	T	ZNF423	ZNF423:NM_001271620:exon7:c.3637G>A:p.E1213K,ZNF423:NM_015069:exon7:c.3817G>A:p.E1273K
verified	705	LFA	69.4	nonsynonymous SNV	chr2	163000649	G	A	GCG	GCG:NM_002054:exon5:c.424C>T:p.L142F
verified	705	LFA	69.4	nonsynonymous SNV	chr1	24664578	C	T	GRHL3	GRHL3:NM_001195010:exon7:c.799C>T:p.R267W,GRHL3:NM_021180:exon7:c.952C>T:p.R318W,GRHL3:NM_198173:exon7:c.937C>T:p.R313W,GRHL3:NM_198174:exon7:c.937C>T:p.R313W
verified	710	HFA	75.25	nonsynonymous SNV	chr17	72477970	G	C	CD300A	CD300A:NM_001256841:exon5:c.433G>C:p.V145L,CD300A:NM_007261:exon6:c.772G>C:p.V258L
verified	710	HFA	75.25	nonsynonymous SNV	chr7	99818182	C	T	PVRIG	PVRIG:NM_024070:exon4:c.482C>T:p.P161L
verified	713	LFA	42	nonsynonymous SNV	chr2	191375154	G	C	NEMP2	NEMP2:NM_001142645:exon8:c.1063C>G:p.R355G
verified	716	LFA	59.25	nonsynonymous SNV	chrX	135485409	C	T	ADGRG4	ADGRG4:NM_153834:exon22:c.8582C>T:p.P2861L
verified	716	LFA	59.25	nonsynonymous SNV	chr15	59323227	A	G	RNF111	RNF111:NM_001270528:exon2:c.206A>G:p.D69G,RNF111:NM_001270529:exon2:c.206A>G:p.D69G,RNF111:NM_001270530:exon2:c.206A>G:p.D69G,RNF111:NM_017610:exon2:c.206A>G:p.D69G
unverified	718	LFA	67.6	nonsynonymous SNV	chr2	231902671	G	A	C2orf72	C2orf72:NM_001144994:exon1:c.391G>A:p.D131N
verified	718	LFA	67.6	nonsynonymous SNV	chr17	7696498	C	T	DNAH2	DNAH2:NM_020877:exon48:c.7544C>T:p.T2515M
verified	718	LFA	67.6	nonsynonymous SNV	chr4	1807363	A	G	FGFR3	FGFR3:NM_022965:exon10:c.1276A>G:p.I426V,FGFR3:NM_000142:exon12:c.1612A>G:p.I538V,FGFR3:NM_001163213:exon12:c.1618A>G:p.I540V
verified	720	NA	NA	nonsynonymous SNV	chr11	117252575	C	T	CEP164	CEP164:NM_001271933:exon12:c.1577C>T:p.S526F,CEP164:NM_014956:exon13:c.1568C>T:p.S523F
unverified	720	NA	NA	nonsynonymous SNV	chr17	40688462	G	A	NAGLU	NAGLU:NM_000263:exon1:c.172G>A:p.A58T
verified	721	LFA	56.6	nonsynonymous SNV	chr16	3169995	T	C	ZNF205	ZNF205:NM_001042428:exon7:c.1334T>C:p.V445A,ZNF205:NM_001278158:exon7:c.1334T>C:p.V445A,ZNF205:NM_003456:exon7:c.1334T>C:p.V445A
verified	728	LFA	56.2	nonsynonymous SNV	chr7	938895	C	T	ADAP1	ADAP1:NM_001284311:exon8:c.586G>A:p.A196T,ADAP1:NM_001284310:exon9:c.655G>A:p.A219T,ADAP1:NM_001284308:exon10:c.904G>A:p.A302T,ADAP1:NM_001284309:exon10:c.655G>A:p.A219T,ADAP1:NM_006869:exon10:c.871G>A:p.A291T
unverified	728	LFA	56.2	nonsynonymous SNV	chr10	126136461	T	C	NKX1-2	NKX1-2:NM_001146340:exon2:c.470A>G:p.E157G
unverified	729	LFA	67	nonsynonymous SNV	chr2	231902684	G	A	C2orf72	C2orf72:NM_001144994:exon1:c.404G>A:p.R135Q
unverified	729	LFA	67	nonsynonymous SNV	chr2	208632728	A	T	FZD5	FZD5:NM_003468:exon2:c.736T>A:p.C246S
verified	730	LFA	46.5	nonsynonymous SNV	chr10	89711900	G	T	PTEN	PTEN:NM_000314:exon6:c.518G>T:p.R173L,PTEN:NM_001304717:exon7:c.1037G>T:p.R346L
verified	731	LFA	56.5	nonsynonymous SNV	chr5	68411142	G	A	SLC30A5	SLC30A5:NM_022902:exon8:c.691G>A:p.V231I
verified	732	HFA	90	nonsynonymous SNV	chr20	23584214	C	T	CST9	CST9:NM_001008693:exon2:c.413G>A:p.C138Y
verified	732	HFA	90	nonsynonymous SNV	chr11	20119250	A	G	NAV2	NAV2:NM_001111019:exon21:c.3332A>G:p.Y1111C,NAV2:NM_001111018:exon31:c.5948A>G:p.Y1983C,NAV2:NM_145117:exon31:c.6140A>G:p.Y2047C,NAV2:NM_182964:exon31:c.6149A>G:p.Y2050C,NAV2:NM_001244963:exon33:c.6317A>G:p.Y2106C
verified	734	LFA	68.2	nonsynonymous SNV	chr2	131116456	C	T	PTPN18	PTPN18:NM_014369:exon2:c.110C>T:p.S37L
unverified	735	HFA	72	nonsynonymous SNV	chr20	57268039	T	A	NPEPL1	NPEPL1:NM_024663:exon1:c.83T>A:p.L28Q
verified	736	LFA	57.5	stopgain	chr16	1793474	C	A	MAPK8IP3	MAPK8IP3:NM_001040439:exon5:c.741C>A:p.Y247X,MAPK8IP3:NM_015133:exon5:c.741C>A:p.Y247X
verified	736	LFA	57.5	nonsynonymous SNV	chr12	44770385	A	G	TMEM117	TMEM117:NM_001286212:exon6:c.464A>G:p.E155G,TMEM117:NM_001286213:exon6:c.344A>G:p.E115G,TMEM117:NM_032256:exon7:c.776A>G:p.E259G
verified	737	LFA	69	nonsynonymous SNV	chr1	119428095	G	A	TBX15	TBX15:NM_152380:exon8:c.751C>T:p.P251S
verified	738	LFA	58.8	nonsynonymous SNV	chr8	132980615	T	C	EFR3A	EFR3A:NM_015137:exon9:c.929T>C:p.V310A
unverified	739	HFA	86.2	nonsynonymous SNV	chr12	569609	T	C	B4GALNT3	B4GALNT3:NM_173593:exon1:c.67T>C:p.F23L
verified	741	HFA	72.6	nonsynonymous SNV	chr1	207236027	C	G	PFKFB2	PFKFB2:NM_001018053:exon4:c.274C>G:p.R92G,PFKFB2:NM_006212:exon4:c.274C>G:p.R92G
verified	743	LFA	54	NA	chr7	74114762	T	G	GTF2I	NA
verified	743	LFA	54	nonsynonymous SNV	chr4	167921548	T	C	SPOCK3	SPOCK3:NM_001204354:exon3:c.35A>G:p.Q12R,SPOCK3:NM_001040159:exon4:c.302A>G:p.Q101R,SPOCK3:NM_001204356:exon4:c.302A>G:p.Q101R,SPOCK3:NM_001204358:exon4:c.302A>G:p.Q101R,SPOCK3:NM_001204352:exon5:c.158A>G:p.Q53R,SPOCK3:NM_016950:exon5:c.311A>G:p.Q104R
verified	743	LFA	54	nonsynonymous SNV	chr1	226053637	G	A	TMEM63A	TMEM63A:NM_014698:exon10:c.706C>T:p.P236S
verified	746	LFA	40	nonsynonymous SNV	chr7	4008997	C	T	SDK1
verified	748	LFA	43.4	frameshift insertion	chr12	81533014	C	CA	ACSS3	ACSS3:NM_024560:exon4:c.751dupA:p.D250fs
verified	748	LFA	43.4	nonsynonymous SNV	chr12	118293302	C	T	KSR2	KSR2:NM_173598:exon3:c.316G>A:p.G106R
verified	749	HFA	84	nonsynonymous SNV	chr17	8052076	G	A	PER1	PER1:NM_002616:exon8:c.934C>T:p.R312W
verified	749	HFA	84	nonsynonymous SNV	chr5	147505413	T	C	SPINK5	SPINK5:NM_006846:exon29:c.2867T>C:p.F956S,SPINK5:NM_001127698:exon30:c.2957T>C:p.F986S
unverified	751	LFA	60	nonsynonymous SNV	chr19	6714030	T	C	C3	C3:NM_000064:exon7:c.746A>G:p.K249R
verified	751	LFA	60	nonsynonymous SNV	chr16	89703694	A	G	DPEP1	DPEP1:NM_001128141:exon7:c.674A>G:p.Q225R,DPEP1:NM_004413:exon7:c.674A>G:p.Q225R
verified	751	LFA	60	nonsynonymous SNV	chr10	93389871	A	G	PPP1R3C	PPP1R3C:NM_005398:exon2:c.767T>C:p.I256T
verified	752	NA	NA	nonsynonymous SNV	chr4	6303671	G	C	WFS1	WFS1:NM_001145853:exon8:c.2149G>C:p.E717Q,WFS1:NM_006005:exon8:c.2149G>C:p.E717Q
verified	754	NA	NA	nonsynonymous SNV	chr11	129794839	G	A	PRDM10	PRDM10:NM_199439:exon8:c.1558C>T:p.H520Y,PRDM10:NM_199438:exon9:c.1570C>T:p.H524Y,PRDM10:NM_199437:exon12:c.1816C>T:p.H606Y,PRDM10:NM_020228:exon13:c.1828C>T:p.H610Y
verified	759	NA	NA	frameshift deletion	chr22	19967687	CA	C	ARVCF	ARVCF:NM_001670:exon6:c.974delT:p.L325fs
verified	759	NA	NA	frameshift deletion	chr4	104065532	CTACTT	C	CENPE	CENPE:NM_001286734:exon32:c.5021_5025del:p.K1674fs,CENPE:NM_001813:exon33:c.5096_5100del:p.K1699fs
verified	759	NA	NA	nonsynonymous SNV	chr17	79867404	C	T	PCYT2	PCYT2:NM_001184917:exon2:c.164G>A:p.G55D,PCYT2:NM_001256433:exon2:c.164G>A:p.G55D,PCYT2:NM_001282204:exon2:c.68G>A:p.G23D,PCYT2:NM_002861:exon2:c.164G>A:p.G55D
verified	760	LFA	68.75	frameshift insertion	chr19	42793443	G	GC	CIC	CIC:NM_015125:exon8:c.1246dupC:p.R415fs,CIC:NM_001304815:exon9:c.3973dupC:p.R1324fs
verified	760	LFA	68.75	nonsynonymous SNV	chr19	55899352	G	A	RPL28	RPL28:NM_000991:exon4:c.260G>A:p.R87H,RPL28:NM_001136134:exon4:c.260G>A:p.R87H,RPL28:NM_001136135:exon4:c.260G>A:p.R87H
verified	760	LFA	68.75	stopgain	chr20	62319344	G	A	RTEL1	RTEL1:NM_001283010:exon17:c.867G>A:p.W289X,RTEL1:NM_001283009:exon18:c.1536G>A:p.W512X,RTEL1:NM_016434:exon18:c.1536G>A:p.W512X,RTEL1:NM_032957:exon18:c.1608G>A:p.W536X
verified	760	LFA	68.75	frameshift deletion	chr19	54618031	CTG	C	TFPT	TFPT:NM_013342:exon2:c.71_72del:p.S24fs
verified	761	LFA	52.6	nonsynonymous SNV	chr15	59752212	A	G	FAM81A	FAM81A:NM_152450:exon3:c.101A>G:p.E34G
verified	765	HFA	70.5	nonsynonymous SNV	chr9	107624039	G	C	ABCA1	ABCA1:NM_005502:exon6:c.464C>G:p.S155C
verified	768	LFA	43.6	nonsynonymous SNV	chr16	84623836	T	G	COTL1	COTL1:NM_021149:exon3:c.193A>C:p.T65P
verified	768	LFA	43.6	nonsynonymous SNV	chr3	121341958	A	T	FBXO40	FBXO40:NM_016298:exon3:c.1682A>T:p.H561L
verified	768	LFA	43.6	nonsynonymous SNV	chr10	38344665	C	T	ZNF33A	ZNF33A:NM_001278170:exon4:c.1631C>T:p.S544L,ZNF33A:NM_001278177:exon5:c.1676C>T:p.S559L,ZNF33A:NM_001278178:exon5:c.1277C>T:p.S426L,ZNF33A:NM_006954:exon5:c.1613C>T:p.S538L,ZNF33A:NM_006974:exon5:c.1610C>T:p.S537L,ZNF33A:NM_001278171:exon6:c.1277C>T:p.S426L,ZNF33A:NM_001278173:exon6:c.1667C>T:p.S556L,ZNF33A:NM_001278174:exon6:c.1277C>T:p.S426L,ZNF33A:NM_001278175:exon6:c.1379C>T:p.S460L,ZNF33A:NM…
verified	769	LFA	59.6	nonsynonymous SNV	chr18	55143942	G	A	ONECUT2	ONECUT2:NM_004852:exon2:c.1502G>A:p.C501Y
verified	778	LFA	55.5	nonsynonymous SNV	chr16	9010402	A	G	USP7	USP7:NM_001286457:exon8:c.815T>C:p.L272S,USP7:NM_003470:exon8:c.863T>C:p.L288S,USP7:NM_001286458:exon9:c.566T>C:p.L189S
verified	780	HFA	70.5	nonsynonymous SNV	chr1	207224297	C	G	YOD1	YOD1:NM_018566:exon1:c.79G>C:p.A27P
unverified	781	LFA	60.6	nonsynonymous SNV	chr20	4229538	A	G	ADRA1D	ADRA1D:NM_000678:exon1:c.67T>C:p.S23P
verified	781	LFA	60.6	nonsynonymous SNV	chr13	49924954	G	T	CAB39L	CAB39L:NM_030925:exon5:c.490C>A:p.Q164K,CAB39L:NM_001287339:exon6:c.490C>A:p.Q164K,CAB39L:NM_001079670:exon7:c.490C>A:p.Q164K,CAB39L:NM_001287337:exon8:c.490C>A:p.Q164K,CAB39L:NM_001287338:exon8:c.490C>A:p.Q164K
verified	781	LFA	60.6	nonsynonymous SNV	chr9	130575791	C	T	FPGS	FPGS:NM_001288803:exon14:c.1594C>T:p.R532C,FPGS:NM_001018078:exon15:c.1522C>T:p.R508C,FPGS:NM_004957:exon15:c.1672C>T:p.R558C
verified	781	LFA	60.6	nonsynonymous SNV	chr17	21101945	C	A	TMEM11	TMEM11:NM_003876:exon2:c.271G>T:p.A91S
verified	783	HFA	138	nonsynonymous SNV	chr2	89036128	G	T	RPIA
verified	785	LFA	64.5	nonsynonymous SNV	chr1	36564075	C	T	COL8A2	COL8A2:NM_001294347:exon4:c.1012G>A:p.G338R,COL8A2:NM_005202:exon4:c.1207G>A:p.G403R
verified	786	HFA	101.5	nonsynonymous SNV	chr17	4166923	G	A	ANKFY1	ANKFY1:NM_001257999:exon1:c.103C>T:p.L35F
unverified	786	HFA	101.5	nonsynonymous SNV	chr16	81129759	C	A	GCSH	GCSH:NM_004483:exon1:c.125G>T:p.R42L
verified	786	HFA	101.5	nonsynonymous SNV	chr6	90448081	G	A	MDN1	MDN1:NM_014611:exon33:c.4687C>T:p.R1563C
verified	786	HFA	101.5	nonsynonymous SNV	chr14	23876273	G	A	MYH6	MYH6:NM_002471:exon3:c.160C>T:p.R54W
verified	786	HFA	101.5	nonsynonymous SNV	chrX	71932673	C	A	PHKA1	PHKA1:NM_001122670:exon2:c.185G>T:p.R62L,PHKA1:NM_001172436:exon2:c.185G>T:p.R62L,PHKA1:NM_002637:exon2:c.185G>T:p.R62L
verified	786	HFA	101.5	frameshift insertion	chr5	150029648	A	AG	SYNPO	SYNPO:NM_001109974:exon2:c.1812dupG:p.K604fs,SYNPO:NM_007286:exon2:c.1812dupG:p.K604fs,SYNPO:NM_001166208:exon3:c.2544dupG:p.K848fs,SYNPO:NM_001166209:exon3:c.2544dupG:p.K848fs
verified	788	LFA	60.25	nonsynonymous SNV	chr5	90106682	C	T	ADGRV1	ADGRV1:NM_032119:exon74:c.15605C>T:p.S5202F
verified	791	LFA	47	stopgain	chr6	157527679	C	T	ARID1B	ARID1B:NM_017519:exon19:c.5365C>T:p.R1789X,ARID1B:NM_020732:exon20:c.5404C>T:p.R1802X
verified	794	HFA	73.5	nonsynonymous SNV	chr11	17156382	T	C	PIK3C2A	PIK3C2A:NM_002645:exon10:c.2092A>G:p.S698G
verified	796	HFA	86.5	nonsynonymous SNV	chr14	24036350	G	T	AP1G2	AP1G2:NM_003917:exon2:c.174C>A:p.H58Q
verified	796	HFA	86.5	nonsynonymous SNV	chr21	33043959	C	A	SCAF4	SCAF4:NM_001145444:exon19:c.3152G>T:p.R1051I,SCAF4:NM_001145445:exon20:c.3131G>T:p.R1044I,SCAF4:NM_020706:exon20:c.3197G>T:p.R1066I
verified	797	HFA	74.4	nonsynonymous SNV	chr19	48607867	C	T	PLA2G4C	PLA2G4C:NM_001159322:exon4:c.265G>A:p.A89T,PLA2G4C:NM_001159323:exon4:c.235G>A:p.A79T,PLA2G4C:NM_003706:exon4:c.235G>A:p.A79T
verified	798	LFA	49.75	nonsynonymous SNV	chr19	10265153	C	T	DNMT1	DNMT1:NM_001379:exon21:c.1787G>A:p.R596Q,DNMT1:NM_001130823:exon22:c.1835G>A:p.R612Q
verified	798	LFA	49.75	nonsynonymous SNV	chr20	46268411	T	C	NCOA3	NCOA3:NM_001174087:exon15:c.2798T>C:p.M933T,NCOA3:NM_001174088:exon15:c.2783T>C:p.M928T,NCOA3:NM_006534:exon15:c.2798T>C:p.M933T,NCOA3:NM_181659:exon15:c.2798T>C:p.M933T
verified	798	LFA	49.75	nonsynonymous SNV	chr1	154988019	G	A	ZBTB7B	ZBTB7B:NM_001256455:exon2:c.883G>A:p.G295R,ZBTB7B:NM_001252406:exon4:c.985G>A:p.G329R
verified	799	LFA	59.5	nonsynonymous SNV	chr15	78780574	G	A	IREB2	IREB2:NM_004136:exon15:c.1847G>A:p.R616H
verified	799	LFA	59.5	nonsynonymous SNV	chr21	46314926	T	G	ITGB2	ITGB2:NM_000211:exon9:c.1043A>C:p.D348A,ITGB2:NM_001127491:exon9:c.1043A>C:p.D348A,ITGB2:NM_001303238:exon9:c.836A>C:p.D279A
verified	799	LFA	59.5	nonsynonymous SNV	chr11	65047090	C	A	POLA2	POLA2:NM_002689:exon7:c.737C>A:p.P246Q
verified	799	LFA	59.5	nonsynonymous SNV	chr19	41096919	C	T	SHKBP1	SHKBP1:NM_138392:exon18:c.1930C>T:p.H644Y
verified	799	LFA	59.5	nonsynonymous SNV	chr7	99129141	C	T	ZKSCAN5	ZKSCAN5:NM_014569:exon7:c.1789C>T:p.R597C,ZKSCAN5:NM_145102:exon7:c.1789C>T:p.R597C
unverified	801	LFA	51.25	nonsynonymous SNV	chr6	150464489	C	G	PPP1R14C	PPP1R14C:NM_030949:exon1:c.161C>G:p.A54G
verified	802	LFA	42.4	nonsynonymous SNV	chr3	183898715	C	T	AP2M1	AP2M1:NM_001025205:exon5:c.502C>T:p.R168W
verified	802	LFA	42.4	nonsynonymous SNV	chr1	18554445	G	A	IGSF21
verified	803	HFA	79.8	nonsynonymous SNV	chr18	28714070	G	A	DSC1	DSC1:NM_004948:exon13:c.1900C>T:p.R634W,DSC1:NM_024421:exon13:c.1900C>T:p.R634W
verified	803	HFA	79.8	nonsynonymous SNV	chr1	39877901	C	T	KIAA0754	KIAA0754:NM_015038:exon1:c.1964C>T:p.A655V
verified	805	LFA	53.1	nonsynonymous SNV	chr12	54332745	T	C	HOXC13	HOXC13:NM_017410:exon1:c.55T>C:p.Y19H
unverified	806	LFA	68	nonsynonymous SNV	chr17	45786277	C	T	TBKBP1	TBKBP1:NM_014726:exon8:c.1178C>T:p.S393L
verified	811	HFA	74.75	nonsynonymous SNV	chr16	51174121	T	C	SALL1	SALL1:NM_001127892:exon2:c.1721A>G:p.K574R,SALL1:NM_002968:exon2:c.2012A>G:p.K671R
verified	811	HFA	74.75	nonsynonymous SNV	chr8	10583994	C	G	SOX7	SOX7:NM_031439:exon2:c.421G>C:p.D141H
verified	811	HFA	74.75	frameshift insertion	chr7	99711695	G	GCGGT	TAF6	TAF6:NM_001190415:exon2:c.248_249insACCG:p.R83fs,TAF6:NM_005641:exon2:c.137_138insACCG:p.R46fs,TAF6:NM_139315:exon2:c.137_138insACCG:p.R46fs
verified	813	HFA	70.5	nonsynonymous SNV	chr3	125170247	C	A	SNX4	SNX4:NM_003794:exon13:c.1207G>T:p.A403S
verified	813	HFA	70.5	nonsynonymous SNV	chr20	30370163	T	C	TPX2	TPX2:NM_012112:exon11:c.1166T>C:p.L389P
verified	814	LFA	46	nonsynonymous SNV	chr21	43325922	T	G	C2CD2	C2CD2:NM_199050:exon10:c.878A>C:p.K293T,C2CD2:NM_015500:exon11:c.1343A>C:p.K448T
verified	814	LFA	46	nonsynonymous SNV	chr1	27426920	C	T	SLC9A1	SLC9A1:NM_003047:exon12:c.2326G>A:p.D776N
verified	815	LFA	62.6	NA	chr1	40432757	G	C	MFSD2A	NM_001287809:exon9:c.811-1G>C,NM_032793:exon9:c.928-1G>C,NM_001136493:exon9:c.967-1G>C,NM_001287808:exon7:c.460-1G>C
verified	816	HFA	83	nonsynonymous SNV	chr8	143545645	G	C	ADGRB1	ADGRB1:NM_001702:exon1:c.86G>C:p.R29P
verified	816	HFA	83	nonsynonymous SNV	chr4	7026948	G	T	TBC1D14	TBC1D14:NM_001113363:exon11:c.1135G>T:p.A379S,TBC1D14:NM_001286805:exon11:c.955G>T:p.A319S,TBC1D14:NM_001113361:exon13:c.1975G>T:p.A659S,TBC1D14:NM_020773:exon13:c.1975G>T:p.A659S
verified	817	LFA	59.75	NA	chr7	1511206	C	A	INTS1	NA
verified	818	LFA	51	nonsynonymous SNV	chr8	144887563	C	T	SCRIB	SCRIB:NM_015356:exon19:c.2389G>A:p.V797M,SCRIB:NM_182706:exon19:c.2389G>A:p.V797M
verified	820	HFA	84	nonsynonymous SNV	chr20	43945378	G	C	RBPJL	RBPJL:NM_001281448:exon12:c.1343G>C:p.R448P,RBPJL:NM_001281449:exon12:c.1330G>C:p.D444H,RBPJL:NM_014276:exon12:c.1333G>C:p.D445H
verified	821	LFA	56.8	nonsynonymous SNV	chr12	56495440	T	A	ERBB3	ERBB3:NM_001982:exon28:c.3630T>A:p.H1210Q
verified	822	LFA	56.5	nonsynonymous SNV	chr3	41275712	T	G	CTNNB1	CTNNB1:NM_001098209:exon10:c.1607T>G:p.L536R,CTNNB1:NM_001098210:exon10:c.1607T>G:p.L536R,CTNNB1:NM_001904:exon10:c.1607T>G:p.L536R
verified	822	LFA	56.5	stopgain	chr20	52773965	G	A	CYP24A1	CYP24A1:NM_000782:exon10:c.1396C>T:p.R466X
verified	822	LFA	56.5	nonsynonymous SNV	chrX	71571619	G	A	HDAC8	HDAC8:NM_001166418:exon8:c.802C>T:p.P268S,HDAC8:NM_018486:exon10:c.1075C>T:p.P359S
verified	824	LFA	56.25	nonsynonymous SNV	chr20	35434275	T	A	SOGA1	SOGA1:NM_080627:exon9:c.2900A>T:p.D967V,SOGA1:NM_199181:exon9:c.2186A>T:p.D729V
verified	825	HFA	81	nonsynonymous SNV	chr10	127724758	G	C	ADAM12	ADAM12:NM_001288973:exon21:c.2486C>G:p.P829R,ADAM12:NM_003474:exon21:c.2495C>G:p.P832R
verified	825	HFA	81	nonsynonymous SNV	chr9	7798617	C	T	TMEM261	TMEM261:NM_033428:exon2:c.295G>A:p.V99I
verified	827	HFA	86	nonsynonymous SNV	chr19	51410258	C	T	KLK4	KLK4:NM_001302961:exon5:c.412G>A:p.V138M,KLK4:NM_004917:exon5:c.697G>A:p.V233M
verified	827	HFA	86	nonsynonymous SNV	chr19	11034826	A	G	YIPF2	YIPF2:NM_024029:exon6:c.410T>C:p.V137A
verified	828	HFA	70	NA	chr15	59944527	T	C	GTF2A2	NA
verified	831	LFA	46.8	stopgain	chr21	33687357	G	A	URB1	URB1:NM_014825:exon39:c.6688C>T:p.Q2230X
verified	832	LFA	54.5	nonsynonymous SNV	chr1	212502651	C	T	PPP2R5A	PPP2R5A:NM_001199756:exon2:c.185C>T:p.A62V,PPP2R5A:NM_006243:exon2:c.356C>T:p.A119V
verified	834	NA	NA	nonsynonymous SNV	chr4	72400094	C	T	SLC4A4	SLC4A4:NM_003759:exon15:c.2299C>T:p.H767Y,SLC4A4:NM_001098484:exon18:c.2431C>T:p.H811Y,SLC4A4:NM_001134742:exon18:c.2431C>T:p.H811Y
verified	836	LFA	51.8	nonsynonymous SNV	chr6	26124504	C	T	HIST1H2AC	HIST1H2AC:NM_003512:exon1:c.44C>T:p.A15V
verified	838	LFA	61	nonsynonymous SNV	chr2	220085843	G	T	ATG9A	ATG9A:NM_024085:exon13:c.2327C>A:p.A776D,ATG9A:NM_001077198:exon14:c.2327C>A:p.A776D
verified	838	LFA	61	nonsynonymous SNV	chr8	123964430	C	G	ZHX2	ZHX2:NM_014943:exon3:c.680C>G:p.S227W
verified	839	LFA	56.5	nonframeshift deletion	chr2	179912025	AAAG	A	CCDC141	CCDC141:NM_001316745:exon2:c.208_210del:p.70_70del,CCDC141:NM_173648:exon2:c.208_210del:p.70_70del
verified	839	LFA	56.5	nonsynonymous SNV	chr1	171486799	T	C	PRRC2C	PRRC2C:NM_015172:exon6:c.590T>C:p.L197P
verified	842	LFA	66.5	nonsynonymous SNV	chrX	103080174	G	A	RAB9B	RAB9B:NM_016370:exon3:c.541C>T:p.H181Y
verified	842	LFA	66.5	nonsynonymous SNV	chr3	127788458	G	A	SEC61A1	SEC61A1:NM_013336:exon12:c.1384G>A:p.V462I
verified	844	LFA	52	nonsynonymous SNV	chr2	73453016	A	G	SMYD5	SMYD5:NM_006062:exon13:c.1199A>G:p.E400G
verified	844	LFA	52	nonsynonymous SNV	chr9	100983217	C	G	TBC1D2	TBC1D2:NM_001267571:exon6:c.1272G>C:p.K424N,TBC1D2:NM_018421:exon6:c.1272G>C:p.K424N
verified	845	LFA	56.5	nonsynonymous SNV	chr2	47256441	C	A	TTC7A	TTC7A:NM_001288955:exon14:c.658C>A:p.L220M,TTC7A:NM_001288951:exon15:c.1720C>A:p.L574M,TTC7A:NM_020458:exon15:c.1720C>A:p.L574M,TTC7A:NM_001288953:exon16:c.1618C>A:p.L540M
verified	846	LFA	59.4	nonsynonymous SNV	chr9	21802769	A	G	MTAP	MTAP:NM_002451:exon1:c.22A>G:p.T8A
verified	847	HFA	73	nonsynonymous SNV	chr14	73945322	C	A	HEATR4	HEATR4:NM_203309:exon17:c.3070G>T:p.A1024S,HEATR4:NM_001220484:exon18:c.3070G>T:p.A1024S
verified	847	HFA	73	nonsynonymous SNV	chr7	107566761	G	A	LAMB1	LAMB1:NM_002291:exon32:c.4931C>T:p.A1644V
verified	847	HFA	73	nonsynonymous SNV	chr16	11824525	T	A	TXNDC11	TXNDC11:NM_001303447:exon4:c.675A>T:p.L225F,TXNDC11:NM_015914:exon4:c.675A>T:p.L225F
verified	852	HFA	106.5	nonsynonymous SNV	chr4	121739680	G	A	PRDM5	PRDM5:NM_001300823:exon5:c.478C>T:p.R160C,PRDM5:NM_001300824:exon5:c.478C>T:p.R160C,PRDM5:NM_018699:exon5:c.478C>T:p.R160C
unverified	853	LFA	56.8	nonsynonymous SNV	chr19	879942	C	G	MED16	MED16:NM_005481:exon8:c.1348G>C:p.G450R
verified	853	LFA	56.8	nonsynonymous SNV	chr8	18258247	A	C	NAT2	NAT2:NM_000015:exon2:c.734A>C:p.N245T
verified	856	HFA	80	nonframeshift deletion	chr4	114264171	AGGTG	A	ANK2	ANK2:NM_001148:exon34:c.4123_4125del:p.1375_1375del,ANK2:NM_020977:exon34:c.4123_4125del:p.1375_1375del,ANK2:NM_001127493:exon36:c.4096_4098del:p.1366_1366del
verified	857	HFA	71.75	nonsynonymous SNV	chr19	46269298	T	C	SIX5	SIX5:NM_175875:exon3:c.1681A>G:p.I561V
verified	858	LFA	62.4	nonsynonymous SNV	chr3	35758849	G	A	ARPP21	ARPP21:NM_001267619:exon11:c.893G>A:p.R298Q,ARPP21:NM_016300:exon13:c.995G>A:p.R332Q
verified	858	LFA	62.4	nonsynonymous SNV	chr19	1272045	G	A	CIRBP	CIRBP:NM_001280:exon6:c.497G>A:p.S166N,CIRBP:NM_001300815:exon6:c.497G>A:p.S166N,CIRBP:NM_001300829:exon6:c.497G>A:p.S166N
verified	859	HFA	84.5	frameshift deletion	chr1	177133635	AG	A	ASTN1	ASTN1:NM_001286164:exon1:c.177delC:p.P59fs,ASTN1:NM_004319:exon1:c.177delC:p.P59fs,ASTN1:NM_207108:exon1:c.177delC:p.P59fs
verified	859	HFA	84.5	nonsynonymous SNV	chr2	219188060	C	G	PNKD	PNKD:NM_022572:exon1:c.70C>G:p.L24V
verified	860	LFA	63	nonsynonymous SNV	chr9	90261452	C	G	DAPK1	DAPK1:NM_001288729:exon13:c.1208C>G:p.S403W,DAPK1:NM_001288730:exon13:c.1208C>G:p.S403W,DAPK1:NM_001288731:exon13:c.1208C>G:p.S403W,DAPK1:NM_004938:exon13:c.1208C>G:p.S403W
verified	860	LFA	63	nonsynonymous SNV	chr20	55111300	T	C	FAM209B	FAM209B:NM_001013646:exon2:c.322T>C:p.Y108H
verified	860	LFA	63	frameshift insertion	chr22	42609988	C	CT	TCF20	TCF20:NM_181492:exon1:c.1323dupA:p.G442fs,TCF20:NM_005650:exon2:c.1323dupA:p.G442fs
unverified	875	LFA	50	nonsynonymous SNV	chr14	103059260	G	T	RCOR1	RCOR1:NM_015156:exon1:c.37G>T:p.G13W
verified	876	HFA	90.5	nonsynonymous SNV	chr5	177641797	C	G	PHYKPL	PHYKPL:NM_001278346:exon10:c.1049G>C:p.R350T,PHYKPL:NM_153373:exon10:c.1172G>C:p.R391T
verified	877	HFA	105	frameshift deletion	chr14	59112150	CCA	C	DACT1	DACT1:NM_001079520:exon4:c.699_700del:p.P233fs,DACT1:NM_016651:exon4:c.810_811del:p.P270fs
verified	878	LFA	63.5	nonsynonymous SNV	chr6	46658935	A	G	TDRD6	TDRD6:NM_001010870:exon1:c.3070A>G:p.K1024E,TDRD6:NM_001168359:exon1:c.3070A>G:p.K1024E
verified	878	LFA	63.5	nonsynonymous SNV	chr19	58489944	G	T	ZNF606	ZNF606:NM_025027:exon7:c.2104C>A:p.H702N
verified	879	HFA	79.25	frameshift deletion	chr21	30343627	CAG	C	LTN1	LTN1:NM_015565:exon7:c.1086_1087del:p.L362fs
unverified	880	LFA	67.25	nonsynonymous SNV	chr1	6508862	G	T	ESPN	ESPN:NM_031475:exon8:c.1626G>T:p.E542D
unverified	881	LFA	58.25	NA	chr12	21201645	G	T	SLCO1B7	NM_001009562:exon8:c.995-1G>T
verified	882	NA	NA	nonsynonymous SNV	chr7	91694652	G	A	AKAP9	AKAP9:NM_005751:exon25:c.6085G>A:p.D2029N,AKAP9:NM_147185:exon25:c.6085G>A:p.D2029N
verified	882	NA	NA	nonsynonymous SNV	chr2	216908669	C	T	PECR	PECR:NM_018441:exon7:c.784G>A:p.D262N
verified	885	LFA	58.5	nonsynonymous SNV	chr17	67287359	T	A	ABCA5	ABCA5:NM_018672:exon11:c.1604A>T:p.D535V,ABCA5:NM_172232:exon12:c.1604A>T:p.D535V
unverified	886	HFA	112.5	nonsynonymous SNV	chr1	1355505	C	A	ANKRD65	ANKRD65:NM_001145210:exon3:c.677G>T:p.G226V
verified	886	HFA	112.5	nonsynonymous SNV	chr13	23914972	A	G	SACS	SACS:NM_001278055:exon8:c.2602T>C:p.W868R,SACS:NM_014363:exon10:c.3043T>C:p.W1015R
verified	887	LFA	60.5	nonsynonymous SNV	chr5	70819785	G	C	BDP1	BDP1:NM_018429:exon25:c.5407G>C:p.E1803Q
verified	887	LFA	60.5	nonsynonymous SNV	chr1	202709802	C	G	KDM5B	KDM5B:NM_006618:exon20:c.3084G>C:p.Q1028H,KDM5B:NM_001314042:exon21:c.3192G>C:p.Q1064H
verified	887	LFA	60.5	stopgain	chr19	35449378	G	A	ZNF792	ZNF792:NM_175872:exon4:c.1381C>T:p.R461X
unverified	888	LFA	53.5	frameshift deletion	chr16	90075212	AG	A	DBNDD1	DBNDD1:NM_001042610:exon3:c.298delC:p.L100fs,DBNDD1:NM_001288709:exon3:c.658delC:p.L220fs,DBNDD1:NM_024043:exon3:c.358delC:p.L120fs,DBNDD1:NM_001288708:exon4:c.298delC:p.L100fs
verified	889	HFA	97.4	nonsynonymous SNV	chr14	45605464	C	T	FANCM	FANCM:NM_001308133:exon1:c.230C>T:p.T77I,FANCM:NM_001308134:exon1:c.230C>T:p.T77I,FANCM:NM_020937:exon1:c.230C>T:p.T77I
unverified	890	LFA	48.5	stopgain	chr1	228345928	G	T	GJC2	GJC2:NM_020435:exon2:c.469G>T:p.E157X
verified	892	HFA	83	nonsynonymous SNV	chr12	91371891	C	A	EPYC	EPYC:NM_004950:exon3:c.314G>T:p.G105V
unverified	894	LFA	68.75	stopgain	chr1	27320713	G	T	TRNP1	TRNP1:NM_001013642:exon1:c.436G>T:p.E146X
verified	898	LFA	57.5	stopgain	chr5	41842799	G	A	OXCT1	OXCT1:NM_000436:exon6:c.649C>T:p.R217X
verified	898	LFA	57.5	nonsynonymous SNV	chr10	89692982	G	A	PTEN	PTEN:NM_000314:exon5:c.466G>A:p.G156R,PTEN:NM_001304717:exon6:c.985G>A:p.G329R
verified	898	LFA	57.5	nonsynonymous SNV	chr17	42390790	G	A	RUNDC3A	RUNDC3A:NM_001144825:exon4:c.377G>A:p.R126Q,RUNDC3A:NM_001144826:exon4:c.362G>A:p.R121Q,RUNDC3A:NM_006695:exon4:c.377G>A:p.R126Q
verified	903	LFA	45.4	stopgain	chr19	47153010	C	A	DACT3	DACT3:NM_145056:exon4:c.619G>T:p.E207X
verified	903	LFA	45.4	nonsynonymous SNV	chr9	130699798	G	C	DPM2	DPM2:NM_003863:exon2:c.8C>G:p.T3R
verified	903	LFA	45.4	nonsynonymous SNV	chr19	56206239	C	T	EPN1	EPN1:NM_013333:exon9:c.1334C>T:p.P445L,EPN1:NM_001130071:exon10:c.1670C>T:p.P557L,EPN1:NM_001130072:exon10:c.1412C>T:p.P471L
verified	904	LFA	51.5	nonsynonymous SNV	chr20	49626296	G	A	KCNG1	KCNG1:NM_002237:exon2:c.580C>T:p.R194C
unverified	904	LFA	51.5	nonsynonymous SNV	chr3	183543328	C	A	MAP6D1	MAP6D1:NM_024871:exon1:c.8G>T:p.W3L
verified	909	NA	NA	nonsynonymous SNV	chr9	136298613	G	T	ADAMTS13	ADAMTS13:NM_139025:exon10:c.1208G>T:p.G403V,ADAMTS13:NM_139026:exon10:c.1115G>T:p.G372V,ADAMTS13:NM_139027:exon10:c.1208G>T:p.G403V
verified	914	LFA	67.4	nonsynonymous SNV	chr17	4446383	C	T	MYBBP1A	MYBBP1A:NM_001105538:exon20:c.2717G>A:p.R906Q,MYBBP1A:NM_014520:exon20:c.2717G>A:p.R906Q
verified	915	LFA	65.6	nonsynonymous SNV	chr4	96073908	G	A	BMPR1B	BMPR1B:NM_001256792:exon10:c.1367G>A:p.R456Q,BMPR1B:NM_001256793:exon10:c.1457G>A:p.R486Q,BMPR1B:NM_001256794:exon10:c.1367G>A:p.R456Q,BMPR1B:NM_001203:exon12:c.1367G>A:p.R456Q
verified	915	LFA	65.6	nonsynonymous SNV	chr7	98792885	A	T	KPNA7	KPNA7:NM_001145715:exon4:c.361T>A:p.F121I
unverified	916	LFA	54	stopgain	chr19	913145	C	A	R3HDM4	R3HDM4:NM_138774:exon1:c.13G>T:p.E5X
verified	916	LFA	54	nonsynonymous SNV	chr1	52941061	T	C	ZCCHC11	ZCCHC11:NM_001009881:exon13:c.2170A>G:p.K724E,ZCCHC11:NM_015269:exon13:c.2170A>G:p.K724E
verified	923	LFA	47.8	nonsynonymous SNV	chr1	156814379	G	C	INSRR	INSRR:NM_014215:exon14:c.2612C>G:p.A871G
verified	923	LFA	47.8	stopgain	chr20	33169448	G	A	PIGU	PIGU:NM_080476:exon10:c.955C>T:p.Q319X
unverified	925	HFA	93.5	nonsynonymous SNV	chr22	17601816	G	T	CECR6	CECR6:NM_031890:exon1:c.202C>A:p.P68T
verified	925	HFA	93.5	stopgain	chr19	38023327	C	T	ZNF793	ZNF793:NM_001013659:exon6:c.85C>T:p.Q29X
verified	926	LFA	51.2	nonsynonymous SNV	chr1	29647252	C	T	PTPRU	PTPRU:NM_001195001:exon26:c.3734C>T:p.T1245M,PTPRU:NM_133178:exon26:c.3743C>T:p.T1248M,PTPRU:NM_005704:exon27:c.3773C>T:p.T1258M,PTPRU:NM_133177:exon27:c.3761C>T:p.T1254M
